# Supplementary material for: A systematic study of the whole genome sequence of Amycolatopsis methanolica strain 239T provides an insight into its physiological and taxonomic properties which correlate with its position in the genus
Source: PubMed Central journal article supplement — Synth Syst Biotechnol. 2016 Sep 1;1(3):169–86. doi: 10.1016/j.synbio.2016.05.001 (PMC5640789; doi:10.1016/j.synbio.2016.05.001), 2016-09-01
Supplement: mmc1.pdf [file mmc1.pdf]

## Supplementary Data

**Table S1.** Positions of 16S rRNA genes in the genomes of four *Amycolatopsis* strains, *Saccharomonospora viridis* DSM 43017<sup>T</sup> and *Saccharopolyspora erythraea* NRRL 2338<sup>T</sup>.

| position1                       | position2                      | position3                         | position4                         | position5                         | position6                         | position7                       | Genome Size                          |
|---------------------------------|--------------------------------|-----------------------------------|-----------------------------------|-----------------------------------|-----------------------------------|---------------------------------|--------------------------------------|
|                                 |                                | AORI_R016<br>1243922-1245382(+)   | AORI_R045<br>6528673-6530133(-)   | AORI_R041<br>5615356-5616816(-)   | AORI_R022<br>1947768-1949228(+)   |                                 | <i>A. orientalis</i><br>8,948,591    |
|                                 |                                | AJAP_r33495<br>7182628-7184132(-) | AJAP_r10595<br>2149092-2150596(+) | AJAP_r14255<br>2961980-2963484(+) | AJAP_r30385<br>6468674-6470178(-) |                                 | <i>A. japonica</i><br>8,961,318      |
|                                 |                                | AMED_R16<br>1295147-1296605(+)    | AMED_R25<br>2307316-2308774(+)    | AMED_R39<br>6685681-6687139(-)    | AMED_R49<br>7616847-7618305(-)    |                                 | <i>A. mediterranei</i><br>10,236,715 |
|                                 | AMETH_R14<br>855318-856795(+)  | AMETH_R17<br>1112871-1114348(+)   |                                   | AMETH_R33<br>2784936-2786413(+)   |                                   |                                 | <i>A. methanolica</i><br>7,237,391   |
|                                 | Svir_05560<br>564225-565751(+) | Svir_07440<br>767227-768753(+)    |                                   | Svir_25530<br>2748393-2749919(-)  |                                   |                                 | <i>S. viridis</i><br>4,308,349       |
| SACE_8101<br>1402739-1404280(+) |                                | SACE_8105<br>1777032-1778573(+)   |                                   | SACE_8112<br>5880147-5881689(-)   |                                   | SACE_8116<br>7218077-7219618(-) | <i>S. erythraea</i><br>8,212,805     |

+: Sense Strand; -: Antisense Strand; the sequence of AORI\_R41 and AORI\_45 are same; the sequence of AMED\_R39 and AMED\_R49 are same; the sequence of AJAP\_r14255 and AJAP\_r30385 are same.

**Table S2.** tRNA counts in the genomes of the four *Amycolatopsis* strains.

| Code        | number                            |                               |                                          |                                               |
|-------------|-----------------------------------|-------------------------------|------------------------------------------|-----------------------------------------------|
|             | <i>A. orientalis</i><br>HCCB10007 | <i>A. mediterranei</i><br>U32 | <i>A.methanolica</i><br>239 <sup>T</sup> | <i>A. japonica</i><br>MG417-CF17 <sup>T</sup> |
| Ala tRNA    | 3                                 | 3                             | 3                                        | 3                                             |
| Arg tRNA    | 4                                 | 5                             | 4                                        | 6                                             |
| Asn tRNA    | 1                                 | 1                             | 1                                        | 2                                             |
| Asp tRNA    | 1                                 | 1                             | 1                                        | 1                                             |
| Cys tRNA    | 1                                 | 1                             | 1                                        | 1                                             |
| Gln tRNA    | 2                                 | 2                             | 2                                        | 2                                             |
| Glu tRNA    | 3                                 | 2                             | 2                                        | 3                                             |
| Gly tRNA    | 4                                 | 4                             | 5                                        | 4                                             |
| His tRNA    | 1                                 | 1                             | 1                                        | 1                                             |
| Ile tRNA    | 1                                 | 1                             | 1                                        | 1                                             |
| Leu tRNA    | 5                                 | 5                             | 5                                        | 5                                             |
| Lys tRNA    | 2                                 | 2                             | 2                                        | 2                                             |
| Met tRNA    | 4                                 | 4                             | 4                                        | 4                                             |
| Phe tRNA    | 1                                 | 1                             | 1                                        | 1                                             |
| Pro tRNA    | 3                                 | 3                             | 3                                        | 3                                             |
| Ser tRNA    | 4                                 | 4                             | 4                                        | 5                                             |
| Thr tRNA    | 3                                 | 3                             | 3                                        | 3                                             |
| Trp tRNA    | 1                                 | 1                             | 1                                        | 1                                             |
| Tyr tRNA    | 1                                 | 2                             | 1                                        | 1                                             |
| Val tRNA    | 5                                 | 5                             | 5                                        | 5                                             |
| SeC(p) tRNA | none                              | 1                             | 1                                        | none                                          |
| Pseudo      | none                              | none                          | none                                     | 1                                             |
| all         | 50                                | 52                            | 51                                       | 55                                            |

The differences are highlighted in red.

**Table S3.** Number of genes associated with the general COG functional categories

| Code | <i>A. methanolica</i><br>239 <sup>T</sup> |       | <i>A. mediterranei</i><br>U32 |       | <i>A. orientalis</i><br>HCCB10007 |       | <i>A. japonica</i><br>MG417-CF17 <sup>T</sup> |       | Description                                                  |
|------|-------------------------------------------|-------|-------------------------------|-------|-----------------------------------|-------|-----------------------------------------------|-------|--------------------------------------------------------------|
|      | Value                                     | %age  | Value                         | %age  | Value                             | %age  | Value                                         | %age  |                                                              |
| Z    | 0                                         | 0     | 0                             | 0     | 0                                 | 0     | 0                                             | 0     | Cytoskeleton                                                 |
| Y    | 0                                         | 0     | 0                             | 0     | 0                                 | 0     | 0                                             | 0     | Nuclear structure                                            |
| W    | 0                                         | 0     | 0                             | 0     | 0                                 | 0     | 0                                             | 0     | Extracellular structures                                     |
| V    | 71                                        | 1.01  | 127                           | 1.38  | 109                               | 1.35  | 99                                            | 1.2   | Defense mechanisms                                           |
| U    | 20                                        | 0.29  | 32                            | 0.35  | 24                                | 0.3   | 19                                            | 0.23  | Intracellular trafficking and secretion                      |
| T    | 199                                       | 2.82  | 402                           | 4.36  | 325                               | 4.01  | 202                                           | 2.44  | Signal transduction mechanisms                               |
| S    | 368                                       | 5.21  | 465                           | 5.04  | 361                               | 4.45  | 275                                           | 3.32  | Function unknown                                             |
| R    | 615                                       | 8.7   | 804                           | 8.72  | 557                               | 6.86  | 502                                           | 6.06  | General function prediction only                             |
| Q    | 266                                       | 3.77  | 254                           | 2.76  | 206                               | 2.54  | 213                                           | 2.57  | Secondary metabolites biosynthesis, transport and catabolism |
| P    | 176                                       | 2.49  | 200                           | 2.17  | 189                               | 2.33  | 160                                           | 1.93  | Inorganic ion transport and metabolism                       |
| O    | 133                                       | 1.89  | 172                           | 1.87  | 134                               | 1.66  | 123                                           | 1.49  | Posttranslational modification, protein turnover, chaperones |
| N    | 5                                         | 0.08  | 11                            | 0.12  | 5                                 | 0.07  | 2                                             | 0.03  | Cell motility and secretion                                  |
| M    | 180                                       | 2.55  | 279                           | 3.03  | 194                               | 2.39  | 152                                           | 1.84  | Cell envelope biogenesis, outer membrane                     |
| L    | 156                                       | 2.21  | 195                           | 2.12  | 141                               | 1.74  | 129                                           | 1.56  | DNA replication, recombination and repair                    |
| K    | 595                                       | 8.42  | 832                           | 9.02  | 687                               | 8.46  | 370                                           | 4.46  | Transcription                                                |
| J    | 186                                       | 2.63  | 193                           | 2.1   | 192                               | 2.37  | 172                                           | 2.08  | Translation, ribosomal structure and biogenesis              |
| I    | 300                                       | 4.25  | 429                           | 4.65  | 308                               | 3.8   | 216                                           | 2.61  | Lipid metabolism                                             |
| H    | 201                                       | 2.85  | 285                           | 3.09  | 187                               | 2.31  | 183                                           | 2.21  | Coenzyme metabolism                                          |
| G    | 332                                       | 4.7   | 560                           | 6.07  | 324                               | 3.99  | 258                                           | 3.11  | Carbohydrate transport and metabolism                        |
| F    | 108                                       | 1.53  | 119                           | 1.29  | 94                                | 1.16  | 95                                            | 1.15  | Nucleotide transport and metabolism                          |
| E    | 447                                       | 6.32  | 500                           | 5.42  | 418                               | 5.15  | 421                                           | 5.08  | Amino acid transport and metabolism                          |
| D    | 36                                        | 0.51  | 34                            | 0.37  | 27                                | 0.34  | 21                                            | 0.26  | Cell division and chromosome partitioning                    |
| C    | 434                                       | 6.14  | 437                           | 4.74  | 307                               | 3.79  | 289                                           | 3.49  | Energy production and conversion                             |
| B    | 1                                         | 0.02  | 1                             | 0.02  | 1                                 | 0.02  | 1                                             | 0.02  | Chromatin structure and dynamics                             |
| A    | 1                                         | 0.02  | 1                             | 0.02  | 4                                 | 0.05  | 1                                             | 0.02  | RNA processing and modification                              |
| -    | 2244                                      | 31.72 | 2896                          | 31.39 | 3327                              | 40.97 | 4395                                          | 52.97 | Not in COGs                                                  |

The Cog annotation was built by BLAST against the Clusters of Orthologous Groups (COGs) Database:

<http://www.ncbi.nlm.nih.gov/COG/>.

**Table S4.** The distribution of the conserved gene AMETH\_3452 in representatives of the class *Actinobacteria* with circular genomes.

| Ratio | length   | strain                                                       | strains_Genus          | subclass         | order            | suborder          | family             |
|-------|----------|--------------------------------------------------------------|------------------------|------------------|------------------|-------------------|--------------------|
| 0.167 | 4830181  | <i>Ilumatobacter coccineus</i> YM16-304 <sup>T</sup>         | <i>Ilumatobacter</i>   | Acidimicrobidae  | Acidimicrobiales | Acidimicrobineae  | Acidimicrobiaceae  |
| 0.56  | 1986154  | <i>Arcanobacterium haemolyticum</i> DSM 20595 <sup>T</sup>   | <i>Arcanobacterium</i> | Actinobacteridae | Actinomycetales  | Actinomycineae    | Actinomycetaceae   |
| 0.429 | 4669183  | <i>Beutenbergia cavernae</i> DSM 12333 <sup>T</sup>          | <i>Beutenbergia</i>    | Actinobacteridae | Actinomycetales  | Micrococcineae    | Beutenbergiaceae   |
| 0.784 | 10467782 | <i>Catenulispora acidiphila</i> DSM 44928 <sup>T</sup>       | <i>Catenulispora</i>   | Actinobacteridae | Actinomycetales  | Catenulisporineae | Catenulisporaceae  |
| 0.599 | 4123179  | <i>Cellulomonas flavigena</i> DSM 20109 <sup>T</sup>         | <i>Cellulomonas</i>    | Actinobacteridae | Actinomycetales  | Micrococcineae    | Cellulomonadaceae  |
| 0.612 | 4266344  | <i>Cellulomonas fimi</i> ATCC 484 <sup>T</sup>               | <i>Cellulomonas</i>    | Actinobacteridae | Actinomycetales  | Micrococcineae    | Cellulomonadaceae  |
| 0.455 | 2446804  | <i>Corynebacterium kroppenstedtii</i> DSM 44385 <sup>T</sup> | <i>Corynebacterium</i> | Actinobacteridae | Actinomycetales  | Corynebacterineae | Corynebacteriaceae |
| 0.464 | 2462499  | <i>Corynebacterium jeikeium</i> K411                         | <i>Corynebacterium</i> | Actinobacteridae | Actinomycetales  | Corynebacterineae | Corynebacteriaceae |
| 0.478 | 2751233  | <i>Corynebacterium terpenotabidum</i> Y-11 <sup>T</sup>      | <i>Corynebacterium</i> | Actinobacteridae | Actinomycetales  | Corynebacterineae | Corynebacteriaceae |
| 0.483 | 3433007  | <i>Corynebacterium variabile</i> DSM 44702                   | <i>Corynebacterium</i> | Actinobacteridae | Actinomycetales  | Corynebacterineae | Corynebacteriaceae |
| 0.486 | 2606374  | <i>Corynebacterium ulcerans</i> BR-AD22                      | <i>Corynebacterium</i> | Actinobacteridae | Actinomycetales  | Corynebacterineae | Corynebacteriaceae |
| 0.49  | 3309401  | <i>Corynebacterium glutamicum</i> ATCC 13032 <sup>T</sup>    | <i>Corynebacterium</i> | Actinobacteridae | Actinomycetales  | Corynebacterineae | Corynebacteriaceae |
| 0.49  | 3282708  | <i>Corynebacterium glutamicum</i> ATCC 13032 <sup>T</sup>    | <i>Corynebacterium</i> | Actinobacteridae | Actinomycetales  | Corynebacterineae | Corynebacteriaceae |
| 0.493 | 2601311  | <i>Corynebacterium resistens</i> DSM 45100 <sup>T</sup>      | <i>Corynebacterium</i> | Actinobacteridae | Actinomycetales  | Corynebacterineae | Corynebacteriaceae |
| 0.494 | 2790189  | <i>Corynebacterium aurimucosum</i> ATCC 700975               | <i>Corynebacterium</i> | Actinobacteridae | Actinomycetales  | Corynebacterineae | Corynebacteriaceae |
| 0.495 | 3309400  | <i>Corynebacterium glutamicum</i> ATCC 13032 <sup>T</sup>    | <i>Corynebacterium</i> | Actinobacteridae | Actinomycetales  | Corynebacterineae | Corynebacteriaceae |
| 0.498 | 2314404  | <i>Corynebacterium pseudotuberculosis</i> 258                | <i>Corynebacterium</i> | Actinobacteridae | Actinomycetales  | Corynebacterineae | Corynebacteriaceae |
| 0.498 | 2320595  | <i>Corynebacterium pseudotuberculosis</i> CIP 52.97          | <i>Corynebacterium</i> | Actinobacteridae | Actinomycetales  | Corynebacterineae | Corynebacteriaceae |
| 0.499 | 2335113  | <i>Corynebacterium pseudotuberculosis</i> 1002               | <i>Corynebacterium</i> | Actinobacteridae | Actinomycetales  | Corynebacterineae | Corynebacteriaceae |
| 0.499 | 2310415  | <i>Corynebacterium pseudotuberculosis</i> 316                | <i>Corynebacterium</i> | Actinobacteridae | Actinomycetales  | Corynebacterineae | Corynebacteriaceae |
| 0.499 | 2293464  | <i>Corynebacterium pseudotuberculosis</i> Cp162              | <i>Corynebacterium</i> | Actinobacteridae | Actinomycetales  | Corynebacterineae | Corynebacteriaceae |
| 0.499 | 2335323  | <i>Corynebacterium pseudotuberculosis</i> PAT10              | <i>Corynebacterium</i> | Actinobacteridae | Actinomycetales  | Corynebacterineae | Corynebacteriaceae |
| 0.5   | 2279118  | <i>Corynebacterium pseudotuberculosis</i> 1/06-A             | <i>Corynebacterium</i> | Actinobacteridae | Actinomycetales  | Corynebacterineae | Corynebacteriaceae |
| 0.5   | 2337628  | <i>Corynebacterium pseudotuberculosis</i> 267                | <i>Corynebacterium</i> | Actinobacteridae | Actinomycetales  | Corynebacterineae | Corynebacteriaceae |
| 0.5   | 2337938  | <i>Corynebacterium pseudotuberculosis</i> 3/99-5             | <i>Corynebacterium</i> | Actinobacteridae | Actinomycetales  | Corynebacterineae | Corynebacteriaceae |
| 0.5   | 2337606  | <i>Corynebacterium pseudotuberculosis</i> 42/02-A            | <i>Corynebacterium</i> | Actinobacteridae | Actinomycetales  | Corynebacterineae | Corynebacteriaceae |
| 0.5   | 2337913  | <i>Corynebacterium pseudotuberculosis</i> FRC41              | <i>Corynebacterium</i> | Actinobacteridae | Actinomycetales  | Corynebacterineae | Corynebacteriaceae |
| 0.5   | 2337730  | <i>Corynebacterium pseudotuberculosis</i> I19                | <i>Corynebacterium</i> | Actinobacteridae | Actinomycetales  | Corynebacterineae | Corynebacteriaceae |
| 0.5   | 2337657  | <i>Corynebacterium pseudotuberculosis</i> P54B96             | <i>Corynebacterium</i> | Actinobacteridae | Actinomycetales  | Corynebacterineae | Corynebacteriaceae |

|       |         |                                                            |                        |                  |                 |                   |                    |
|-------|---------|------------------------------------------------------------|------------------------|------------------|-----------------|-------------------|--------------------|
| 0.502 | 2328208 | <i>Corynebacterium pseudotuberculosis</i> C231             | <i>Corynebacterium</i> | Actinobacteridae | Actinomycetales | Corynebacterineae | Corynebacteriaceae |
| 0.503 | 2297010 | <i>Corynebacterium pseudotuberculosis</i> 31               | <i>Corynebacterium</i> | Actinobacteridae | Actinomycetales | Corynebacterineae | Corynebacteriaceae |
| 0.505 | 2478364 | <i>Corynebacterium diphtheriae</i> HC03                    | <i>Corynebacterium</i> | Actinobacteridae | Actinomycetales | Corynebacterineae | Corynebacteriaceae |
| 0.505 | 2502095 | <i>Corynebacterium ulcerans</i> 809                        | <i>Corynebacterium</i> | Actinobacteridae | Actinomycetales | Corynebacterineae | Corynebacteriaceae |
| 0.507 | 2484332 | <i>Corynebacterium diphtheriae</i> HC04                    | <i>Corynebacterium</i> | Actinobacteridae | Actinomycetales | Corynebacterineae | Corynebacteriaceae |
| 0.511 | 2433326 | <i>Corynebacterium diphtheriae</i> CDCE 8392               | <i>Corynebacterium</i> | Actinobacteridae | Actinomycetales | Corynebacterineae | Corynebacteriaceae |
| 0.511 | 2468612 | <i>Corynebacterium diphtheriae</i> HC02                    | <i>Corynebacterium</i> | Actinobacteridae | Actinomycetales | Corynebacterineae | Corynebacteriaceae |
| 0.513 | 2395441 | <i>Corynebacterium diphtheriae</i> VA01                    | <i>Corynebacterium</i> | Actinobacteridae | Actinomycetales | Corynebacterineae | Corynebacteriaceae |
| 0.513 | 2369219 | <i>Corynebacterium urealyticum</i> DSM 7109 <sup>T</sup>   | <i>Corynebacterium</i> | Actinobacteridae | Actinomycetales | Corynebacterineae | Corynebacteriaceae |
| 0.516 | 2530683 | <i>Corynebacterium diphtheriae</i> PW8                     | <i>Corynebacterium</i> | Actinobacteridae | Actinomycetales | Corynebacterineae | Corynebacteriaceae |
| 0.517 | 2488635 | <i>Corynebacterium diphtheriae</i> NCTC 13129              | <i>Corynebacterium</i> | Actinobacteridae | Actinomycetales | Corynebacterineae | Corynebacteriaceae |
| 0.517 | 2316065 | <i>Corynebacterium urealyticum</i> DSM 7111                | <i>Corynebacterium</i> | Actinobacteridae | Actinomycetales | Corynebacterineae | Corynebacteriaceae |
| 0.519 | 2535346 | <i>Corynebacterium diphtheriae</i> 31A                     | <i>Corynebacterium</i> | Actinobacteridae | Actinomycetales | Corynebacterineae | Corynebacteriaceae |
| 0.519 | 2485519 | <i>Corynebacterium diphtheriae</i> BH8                     | <i>Corynebacterium</i> | Actinobacteridae | Actinomycetales | Corynebacterineae | Corynebacteriaceae |
| 0.519 | 3135752 | <i>Corynebacterium halotolerans</i> YIM 70093 <sup>T</sup> | <i>Corynebacterium</i> | Actinobacteridae | Actinomycetales | Corynebacterineae | Corynebacteriaceae |
| 0.52  | 2426551 | <i>Corynebacterium diphtheriae</i> 241                     | <i>Corynebacterium</i> | Actinobacteridae | Actinomycetales | Corynebacterineae | Corynebacteriaceae |
| 0.52  | 2427149 | <i>Corynebacterium diphtheriae</i> HC01                    | <i>Corynebacterium</i> | Actinobacteridae | Actinomycetales | Corynebacterineae | Corynebacteriaceae |
| 0.522 | 2579188 | <i>Corynebacterium ulcerans</i> 0102                       | <i>Corynebacterium</i> | Actinobacteridae | Actinomycetales | Corynebacterineae | Corynebacteriaceae |
| 0.523 | 2499189 | <i>Corynebacterium diphtheriae</i> C7 beta                 | <i>Corynebacterium</i> | Actinobacteridae | Actinomycetales | Corynebacterineae | Corynebacteriaceae |
| 0.524 | 3079253 | <i>Corynebacterium glutamicum</i> MB001                    | <i>Corynebacterium</i> | Actinobacteridae | Actinomycetales | Corynebacterineae | Corynebacteriaceae |
| 0.525 | 2449071 | <i>Corynebacterium diphtheriae</i> INCA 402                | <i>Corynebacterium</i> | Actinobacteridae | Actinomycetales | Corynebacterineae | Corynebacteriaceae |
| 0.532 | 2839551 | <i>Corynebacterium callunae</i> DSM 20147 <sup>T</sup>     | <i>Corynebacterium</i> | Actinobacteridae | Actinomycetales | Corynebacterineae | Corynebacteriaceae |
| 0.533 | 3314179 | <i>Corynebacterium glutamicum</i> R                        | <i>Corynebacterium</i> | Actinobacteridae | Actinomycetales | Corynebacterineae | Corynebacteriaceae |
| 0.537 | 2787574 | <i>Corynebacterium maris</i> DSM 45190 <sup>T</sup>        | <i>Corynebacterium</i> | Actinobacteridae | Actinomycetales | Corynebacterineae | Corynebacteriaceae |
| 0.542 | 3350620 | <i>Corynebacterium glutamicum</i> SCgG1                    | <i>Corynebacterium</i> | Actinobacteridae | Actinomycetales | Corynebacterineae | Corynebacteriaceae |
| 0.542 | 3350619 | <i>Corynebacterium glutamicum</i> SCgG2                    | <i>Corynebacterium</i> | Actinobacteridae | Actinomycetales | Corynebacterineae | Corynebacteriaceae |
| 0.555 | 3147090 | <i>Corynebacterium efficiens</i> YS-314 <sup>T</sup>       | <i>Corynebacterium</i> | Actinobacteridae | Actinomycetales | Corynebacterineae | Corynebacteriaceae |
| 0.536 | 3614992 | <i>Brachybacterium faecium</i> DSM 4810 <sup>T</sup>       | <i>Brachybacterium</i> | Actinobacteridae | Actinomycetales | Micrococcineae    | Dermabacteraceae   |
| 0.43  | 2785024 | <i>Kytococcus sedentarius</i> DSM 20547 <sup>T</sup>       | <i>Kytococcus</i>      | Actinobacteridae | Actinomycetales | Micrococcineae    | Dermacoccaceae     |
| 0.3   | 5433628 | <i>Frankia</i> sp. CcI3                                    | <i>Frankia</i>         | Actinobacteridae | Actinomycetales | Frankineae        | Frankiaceae        |
| 0.31  | 7497934 | <i>Frankia alni</i> ACN14a                                 | <i>Frankia</i>         | Actinobacteridae | Actinomycetales | Frankineae        | Frankiaceae        |
| 0.323 | 8815781 | <i>Frankia</i> sp. EuI1c                                   | <i>Frankia</i>         | Actinobacteridae | Actinomycetales | Frankineae        | Frankiaceae        |
| 0.689 | 8982042 | <i>Frankia</i> sp. EAN1pec                                 | <i>Frankia</i>         | Actinobacteridae | Actinomycetales | Frankineae        | Frankiaceae        |

|       |         |                                                                       |                         |                  |                 |                    |                     |
|-------|---------|-----------------------------------------------------------------------|-------------------------|------------------|-----------------|--------------------|---------------------|
| 0.953 | 4875340 | <i>Blastococcus saxobsidens</i> DD2                                   | <i>Blastococcus</i>     | Actinobacteridae | Actinomycetales | Frankineae         | Geodermatophilaceae |
| 0.971 | 5575517 | <i>Modestobacter marinus</i>                                          | <i>Modestobacter</i>    | Actinobacteridae | Actinomycetales | Frankineae         | Geodermatophilaceae |
| 0.972 | 5322497 | <i>Geodermatophilus obscurus</i> DSM 43160 <sup>T</sup>               | <i>Geodermatophilus</i> | Actinobacteridae | Actinomycetales | Frankineae         | Geodermatophilaceae |
| 0.681 | 6841557 | <i>Stackebrandtia nassauensis</i> DSM 44728 <sup>T</sup>              | <i>Stackebrandtia</i>   | Actinobacteridae | Actinomycetales | Glycomycineae      | Glycomycetaceae     |
| 0.596 | 4024382 | <i>Intrasporangium calvum</i> DSM 43043 <sup>T</sup>                  | <i>Intrasporangium</i>  | Actinobacteridae | Actinomycetales | Micrococcineae     | Intrasporangiaceae  |
| 0.607 | 2749646 | <i>Jonesia denitrificans</i> DSM 20603 <sup>T</sup>                   | <i>Jonesia</i>          | Actinobacteridae | Actinomycetales | Micrococcineae     | Jonesiaceae         |
| 0.321 | 2584158 | <i>Leifsonia xyli</i> subsp. <i>xyli</i> str. CTCB07                  | <i>Leifsonia</i>        | Actinobacteridae | Actinomycetales | Micrococcineae     | Microbacteriaceae   |
| 0.432 | 3258645 | <i>Clavibacter michiganensis</i> subsp. <i>sepedonicus</i>            | <i>Clavibacter</i>      | Actinobacteridae | Actinomycetales | Micrococcineae     | Microbacteriaceae   |
| 0.532 | 2686418 | <i>Leifsonia xyli</i> subsp. <i>cynodontis</i> DSM 46306 <sup>T</sup> | <i>Leifsonia</i>        | Actinobacteridae | Actinomycetales | Micrococcineae     | Microbacteriaceae   |
| 0.643 | 3063596 | <i>Clavibacter michiganensis nebraskensis</i> NCPPB 2581 <sup>T</sup> | <i>Clavibacter</i>      | Actinobacteridae | Actinomycetales | Micrococcineae     | Microbacteriaceae   |
| 0.649 | 3297891 | <i>Clavibacter michiganensis</i> NCPPB 382                            | <i>Clavibacter</i>      | Actinobacteridae | Actinomycetales | Micrococcineae     | Microbacteriaceae   |
| 0.497 | 4250414 | <i>Arthrobacter phenanthrenivorans</i> Sphe3 <sup>T</sup>             | <i>Arthrobacter</i>     | Actinobacteridae | Actinomycetales | Micrococcineae     | Micrococcaceae      |
| 0.498 | 3859257 | <i>Arthrobacter arilaitensis</i> Re117 <sup>T</sup>                   | <i>Arthrobacter</i>     | Actinobacteridae | Actinomycetales | Micrococcineae     | Micrococcaceae      |
| 0.507 | 4395537 | <i>Arthrobacter chlorophenicus</i> A6 <sup>T</sup>                    | <i>Arthrobacter</i>     | Actinobacteridae | Actinomycetales | Micrococcineae     | Micrococcaceae      |
| 0.534 | 3155250 | <i>Renibacterium salmoninarum</i> ATCC 33209 <sup>T</sup>             | <i>Renibacterium</i>    | Actinobacteridae | Actinomycetales | Micrococcineae     | Micrococcaceae      |
| 0.535 | 2501097 | <i>Micrococcus luteus</i> NCTC 2665 <sup>T</sup>                      | <i>Micrococcus</i>      | Actinobacteridae | Actinomycetales | Micrococcineae     | Micrococcaceae      |
| 0.536 | 4597686 | <i>Arthrobacter aurescens</i> TC1                                     | <i>Arthrobacter</i>     | Actinobacteridae | Actinomycetales | Micrococcineae     | Micrococcaceae      |
| 0.536 | 4698945 | <i>Arthrobacter</i> sp. FB24                                          | <i>Arthrobacter</i>     | Actinobacteridae | Actinomycetales | Micrococcineae     | Micrococcaceae      |
| 0.542 | 2697540 | <i>Kocuria rhizophila</i> DC2201                                      | <i>Kocuria</i>          | Actinobacteridae | Actinomycetales | Micrococcineae     | Micrococcaceae      |
| 0.558 | 4736495 | <i>Arthrobacter nitroguajacolicus</i> Rue61a                          | <i>Arthrobacter</i>     | Actinobacteridae | Actinomycetales | Micrococcineae     | Micrococcaceae      |
| 0.207 | 8773466 | <i>Actinoplanes missouriensis</i> 431                                 | <i>Actinoplanes</i>     | Actinobacteridae | Actinomycetales | Micromonosporineae | Micromonosporaceae  |
| 0.222 | 9239851 | <i>Actinoplanes</i> SE50/110                                          | <i>Actinoplanes</i>     | Actinobacteridae | Actinomycetales | Micromonosporineae | Micromonosporaceae  |
| 0.266 | 9228054 | <i>Actinoplanes</i> N902-109                                          | <i>Actinoplanes</i>     | Actinobacteridae | Actinomycetales | Micromonosporineae | Micromonosporaceae  |
| 0.617 | 6962533 | <i>Micromonospora</i> sp. L5                                          | <i>Micromonospora</i>   | Actinobacteridae | Actinomycetales | Micromonosporineae | Micromonosporaceae  |
| 0.647 | 5786361 | <i>Salinispora arenicola</i> CNS-205                                  | <i>Salinispora</i>      | Actinobacteridae | Actinomycetales | Micromonosporineae | Micromonosporaceae  |
| 0.667 | 5183331 | <i>Salinispora tropica</i> CNB-440 <sup>T</sup>                       | <i>Salinispora</i>      | Actinobacteridae | Actinomycetales | Micromonosporineae | Micromonosporaceae  |
| 0.684 | 7025559 | <i>Micromonospora aurantiaca</i> ATCC 27029 <sup>T</sup>              | <i>Micromonospora</i>   | Actinobacteridae | Actinomycetales | Micromonosporineae | Micromonosporaceae  |
| 0.399 | 4829781 | <i>Mycobacterium avium</i> subsp. <i>paratuberculosis</i> K-10        | <i>Mycobacterium</i>    | Actinobacteridae | Actinomycetales | Corynebacterineae  | Mycobacteriaceae    |
| 0.41  | 6048425 | <i>Mycobacterium</i> sp. JLS                                          | <i>Mycobacterium</i>    | Actinobacteridae | Actinomycetales | Corynebacterineae  | Mycobacteriaceae    |
| 0.421 | 6464916 | <i>Mycobacterium smegmatis</i> JS623                                  | <i>Mycobacterium</i>    | Actinobacteridae | Actinomycetales | Corynebacterineae  | Mycobacteriaceae    |
| 0.422 | 4738809 | <i>Amycolicococcus subflavus</i> DQS3-9A1 <sup>T</sup>                | <i>Amycolicococcus</i>  | Actinobacteridae | Actinomycetales | Corynebacterineae  | Mycobacteriaceae    |
| 0.43  | 6491865 | <i>Mycobacterium vanbaalenii</i> PYR-1 <sup>T</sup>                   | <i>Mycobacterium</i>    | Actinobacteridae | Actinomycetales | Corynebacterineae  | Mycobacteriaceae    |
| 0.434 | 5705448 | <i>Mycobacterium</i> sp. MCS                                          | <i>Mycobacterium</i>    | Actinobacteridae | Actinomycetales | Corynebacterineae  | Mycobacteriaceae    |

|       |         |                                                      |               |                  |                 |                   |                  |
|-------|---------|------------------------------------------------------|---------------|------------------|-----------------|-------------------|------------------|
| 0.435 | 5737227 | Mycobacterium sp. KMS                                | Mycobacterium | Actinobacteridae | Actinomycetales | Corynebacterineae | Mycobacteriaceae |
| 0.437 | 5583723 | Mycobacterium chubuense NBB4                         | Mycobacterium | Actinobacteridae | Actinomycetales | Corynebacterineae | Mycobacteriaceae |
| 0.443 | 6988208 | Mycobacterium smegmatis str. MC2 155                 | Mycobacterium | Actinobacteridae | Actinomycetales | Corynebacterineae | Mycobacteriaceae |
| 0.443 | 6988209 | Mycobacterium smegmatis str. MC2 155                 | Mycobacterium | Actinobacteridae | Actinomycetales | Corynebacterineae | Mycobacteriaceae |
| 0.445 | 5631606 | Mycobacterium ulcerans Agy99                         | Mycobacterium | Actinobacteridae | Actinomycetales | Corynebacterineae | Mycobacteriaceae |
| 0.445 | 5521023 | Mycobacterium yongonense 05-1390 <sup>T</sup>        | Mycobacterium | Actinobacteridae | Actinomycetales | Corynebacterineae | Mycobacteriaceae |
| 0.453 | 5501090 | Mycobacterium intracellulare MOTT-64                 | Mycobacterium | Actinobacteridae | Actinomycetales | Corynebacterineae | Mycobacteriaceae |
| 0.457 | 5589007 | Mycobacterium indicus pranii MTCC 9506               | Mycobacterium | Actinobacteridae | Actinomycetales | Corynebacterineae | Mycobacteriaceae |
| 0.46  | 5475491 | Mycobacterium avium 104                              | Mycobacterium | Actinobacteridae | Actinomycetales | Corynebacterineae | Mycobacteriaceae |
| 0.468 | 5613626 | Mycobacterium sp. MOTT36Y                            | Mycobacterium | Actinobacteridae | Actinomycetales | Corynebacterineae | Mycobacteriaceae |
| 0.473 | 4829424 | Mycobacterium avium subsp. paratuberculosis MAP4     | Mycobacterium | Actinobacteridae | Actinomycetales | Corynebacterineae | Mycobacteriaceae |
| 0.483 | 5402402 | Mycobacterium intracellulare ATCC 13950 <sup>T</sup> | Mycobacterium | Actinobacteridae | Actinomycetales | Corynebacterineae | Mycobacteriaceae |
| 0.484 | 5409696 | Mycobacterium intracellulare MOTT-02                 | Mycobacterium | Actinobacteridae | Actinomycetales | Corynebacterineae | Mycobacteriaceae |
| 0.486 | 4398250 | Mycobacterium tuberculosis KZN 1435                  | Mycobacterium | Actinobacteridae | Actinomycetales | Corynebacterineae | Mycobacteriaceae |
| 0.486 | 4394985 | Mycobacterium tuberculosis KZN 4207                  | Mycobacterium | Actinobacteridae | Actinomycetales | Corynebacterineae | Mycobacteriaceae |
| 0.486 | 4399120 | Mycobacterium tuberculosis KZN 605                   | Mycobacterium | Actinobacteridae | Actinomycetales | Corynebacterineae | Mycobacteriaceae |
| 0.488 | 6208955 | Mycobacterium liflandii 128FXT                       | Mycobacterium | Actinobacteridae | Actinomycetales | Corynebacterineae | Mycobacteriaceae |
| 0.511 | 4376711 | Mycobacterium bovis BCG str. Korea 1168P             | Mycobacterium | Actinobacteridae | Actinomycetales | Corynebacterineae | Mycobacteriaceae |
| 0.516 | 4350386 | Mycobacterium bovis BCG str. Mexico                  | Mycobacterium | Actinobacteridae | Actinomycetales | Corynebacterineae | Mycobacteriaceae |
| 0.516 | 4405981 | Mycobacterium tuberculosis CCDC5180                  | Mycobacterium | Actinobacteridae | Actinomycetales | Corynebacterineae | Mycobacteriaceae |
| 0.517 | 4371711 | Mycobacterium bovis BCG str. Tokyo 172               | Mycobacterium | Actinobacteridae | Actinomycetales | Corynebacterineae | Mycobacteriaceae |
| 0.517 | 4398812 | Mycobacterium tuberculosis CCDC5079                  | Mycobacterium | Actinobacteridae | Actinomycetales | Corynebacterineae | Mycobacteriaceae |
| 0.518 | 4374522 | Mycobacterium bovis BCG str. Pasteur 1173P2          | Mycobacterium | Actinobacteridae | Actinomycetales | Corynebacterineae | Mycobacteriaceae |
| 0.518 | 4411128 | Mycobacterium tuberculosis str.Beijing/NITR203       | Mycobacterium | Actinobacteridae | Actinomycetales | Corynebacterineae | Mycobacteriaceae |
| 0.518 | 4392876 | Mycobacterium tuberculosis CAS/NITR204               | Mycobacterium | Actinobacteridae | Actinomycetales | Corynebacterineae | Mycobacteriaceae |
| 0.518 | 4414325 | Mycobacterium tuberculosis CCDC5079                  | Mycobacterium | Actinobacteridae | Actinomycetales | Corynebacterineae | Mycobacteriaceae |
| 0.518 | 4411708 | Mycobacterium tuberculosis H37Rv <sup>T</sup>        | Mycobacterium | Actinobacteridae | Actinomycetales | Corynebacterineae | Mycobacteriaceae |
| 0.518 | 4411532 | Mycobacterium tuberculosis H37Rv <sup>T</sup>        | Mycobacterium | Actinobacteridae | Actinomycetales | Corynebacterineae | Mycobacteriaceae |
| 0.518 | 4406587 | Mycobacterium tuberculosis RGTB423                   | Mycobacterium | Actinobacteridae | Actinomycetales | Corynebacterineae | Mycobacteriaceae |
| 0.518 | 4418088 | Mycobacterium tuberculosis UT205                     | Mycobacterium | Actinobacteridae | Actinomycetales | Corynebacterineae | Mycobacteriaceae |
| 0.519 | 4389314 | Mycobacterium africanum GM041182                     | Mycobacterium | Actinobacteridae | Actinomycetales | Corynebacterineae | Mycobacteriaceae |
| 0.519 | 4421197 | Mycobacterium tuberculosis 7199-99                   | Mycobacterium | Actinobacteridae | Actinomycetales | Corynebacterineae | Mycobacteriaceae |
| 0.519 | 4403837 | Mycobacterium tuberculosis CDC1551                   | Mycobacterium | Actinobacteridae | Actinomycetales | Corynebacterineae | Mycobacteriaceae |

|       |         |                                                                                     |                      |                  |                 |                     |                       |
|-------|---------|-------------------------------------------------------------------------------------|----------------------|------------------|-----------------|---------------------|-----------------------|
| 0.519 | 4398525 | <i>Mycobacterium tuberculosis</i> CTRI-2                                            | <i>Mycobacterium</i> | Actinobacteridae | Actinomycetales | Corynebacterineae   | Mycobacteriaceae      |
| 0.519 | 4391174 | <i>Mycobacterium tuberculosis</i> EAI5                                              | <i>Mycobacterium</i> | Actinobacteridae | Actinomycetales | Corynebacterineae   | Mycobacteriaceae      |
| 0.519 | 4390306 | <i>Mycobacterium tuberculosis</i> EAI5/NITR206                                      | <i>Mycobacterium</i> | Actinobacteridae | Actinomycetales | Corynebacterineae   | Mycobacteriaceae      |
| 0.519 | 4392353 | <i>Mycobacterium tuberculosis</i> str. Erdman = ATCC 35801                          | <i>Mycobacterium</i> | Actinobacteridae | Actinomycetales | Corynebacterineae   | Mycobacteriaceae      |
| 0.519 | 4424435 | <i>Mycobacterium tuberculosis</i> F11                                               | <i>Mycobacterium</i> | Actinobacteridae | Actinomycetales | Corynebacterineae   | Mycobacteriaceae      |
| 0.519 | 4419977 | <i>Mycobacterium tuberculosis</i> H37Ra                                             | <i>Mycobacterium</i> | Actinobacteridae | Actinomycetales | Corynebacterineae   | Mycobacteriaceae      |
| 0.519 | 4408224 | <i>Mycobacterium tuberculosis</i> str. Haarlem                                      | <i>Mycobacterium</i> | Actinobacteridae | Actinomycetales | Corynebacterineae   | Mycobacteriaceae      |
| 0.519 | 4404786 | <i>Mycobacterium tuberculosis</i> str. Haarlem/NITR202                              | <i>Mycobacterium</i> | Actinobacteridae | Actinomycetales | Corynebacterineae   | Mycobacteriaceae      |
| 0.52  | 4432426 | <i>Mycobacterium canettii</i> CIPT 140060008                                        | <i>Mycobacterium</i> | Actinobacteridae | Actinomycetales | Corynebacterineae   | Mycobacteriaceae      |
| 0.52  | 4380119 | <i>Mycobacterium tuberculosis</i> RGTB327                                           | <i>Mycobacterium</i> | Actinobacteridae | Actinomycetales | Corynebacterineae   | Mycobacteriaceae      |
| 0.521 | 4482059 | <i>Mycobacterium canettii</i> CIPT 140010059                                        | <i>Mycobacterium</i> | Actinobacteridae | Actinomycetales | Corynebacterineae   | Mycobacteriaceae      |
| 0.522 | 4345492 | <i>Mycobacterium bovis</i> AF2122/97                                                | <i>Mycobacterium</i> | Actinobacteridae | Actinomycetales | Corynebacterineae   | Mycobacteriaceae      |
| 0.524 | 4524466 | <i>Mycobacterium canettii</i> CIPT 140070017                                        | <i>Mycobacterium</i> | Actinobacteridae | Actinomycetales | Corynebacterineae   | Mycobacteriaceae      |
| 0.526 | 4420197 | <i>Mycobacterium canettii</i> CIPT 140070008                                        | <i>Mycobacterium</i> | Actinobacteridae | Actinomycetales | Corynebacterineae   | Mycobacteriaceae      |
| 0.53  | 4525948 | <i>Mycobacterium canettii</i> CIPT 140070010                                        | <i>Mycobacterium</i> | Actinobacteridae | Actinomycetales | Corynebacterineae   | Mycobacteriaceae      |
| 0.548 | 6636827 | <i>Mycobacterium marinum</i> M                                                      | <i>Mycobacterium</i> | Actinobacteridae | Actinomycetales | Corynebacterineae   | Mycobacteriaceae      |
| 0.552 | 4643668 | <i>Mycobacterium</i> sp. JDM601                                                     | <i>Mycobacterium</i> | Actinobacteridae | Actinomycetales | Corynebacterineae   | Mycobacteriaceae      |
| 0.57  | 5000473 | <i>Mycobacterium abscessus</i> subsp. <i>bolletii</i> 50594                         | <i>Mycobacterium</i> | Actinobacteridae | Actinomycetales | Corynebacterineae   | Mycobacteriaceae      |
| 0.574 | 5067172 | <i>Mycobacterium abscessus</i>                                                      | <i>Mycobacterium</i> | Actinobacteridae | Actinomycetales | Corynebacterineae   | Mycobacteriaceae      |
| 0.583 | 5547747 | <i>Mycobacterium gilvum</i> Spyr1                                                   | <i>Mycobacterium</i> | Actinobacteridae | Actinomycetales | Corynebacterineae   | Mycobacteriaceae      |
| 0.421 | 6060298 | <i>Nakamurella multipartita</i> DSM 44233 <sup>T</sup>                              | <i>Nakamurella</i>   | Actinobacteridae | Actinomycetales | Frankineae          | Nakamurellaceae       |
| 0.469 | 5669805 | <i>Gordonia polyisoprenivorans</i> VH2                                              | <i>Gordonia</i>      | Actinobacteridae | Actinomycetales | Corynebacterineae   | Nocardiaceae          |
| 0.472 | 5043170 | <i>Rhodococcus equi</i> 103S                                                        | <i>Rhodococcus</i>   | Actinobacteridae | Actinomycetales | Corynebacterineae   | Nocardiaceae          |
| 0.474 | 6194645 | <i>Nocardia cyriacigeorgica</i> GUH-2                                               | <i>Nocardia</i>      | Actinobacteridae | Actinomycetales | Corynebacterineae   | Nocardiaceae          |
| 0.484 | 6281198 | <i>Rhodococcus erythropolis</i> CCM2595                                             | <i>Rhodococcus</i>   | Actinobacteridae | Actinomycetales | Corynebacterineae   | Nocardiaceae          |
| 0.495 | 5208602 | <i>Gordonia bronchialis</i> DSM 43247 <sup>T</sup>                                  | <i>Gordonia</i>      | Actinobacteridae | Actinomycetales | Corynebacterineae   | Nocardiaceae          |
| 0.509 | 6516310 | <i>Rhodococcus erythropolis</i> PR4                                                 | <i>Rhodococcus</i>   | Actinobacteridae | Actinomycetales | Corynebacterineae   | Nocardiaceae          |
| 0.612 | 6021225 | <i>Nocardia farcinica</i> IFM 10152                                                 | <i>Nocardia</i>      | Actinobacteridae | Actinomycetales | Corynebacterineae   | Nocardiaceae          |
| 0.666 | 9436348 | <i>Nocardia brasiliensis</i> ATCC 700358                                            | <i>Nocardia</i>      | Actinobacteridae | Actinomycetales | Corynebacterineae   | Nocardiaceae          |
| 0.333 | 7579488 | <i>Kribbella flavida</i> DSM 17836 <sup>T</sup>                                     | <i>Kribbella</i>     | Actinobacteridae | Actinomycetales | Propionibacterineae | Nocardiodiaceae       |
| 0.408 | 4985871 | <i>Nocardioides</i> sp. JS614                                                       | <i>Nocardioides</i>  | Actinobacteridae | Actinomycetales | Propionibacterineae | Nocardiodiaceae       |
| 0.15  | 5767958 | <i>Nocardioopsis dassonvillei</i> subsp. <i>dassonvillei</i> DSM 43111 <sup>T</sup> | <i>Nocardioopsis</i> | Actinobacteridae | Actinomycetales | Streptosporangineae | Nocardioipsaceae      |
| 0.632 | 3742776 | <i>Xylanimonas cellulositytica</i> DSM 15894 <sup>T</sup>                           | <i>Xylanimonas</i>   | Actinobacteridae | Actinomycetales | Micrococcineae      | Promicromonosporaceae |



|       |          |                                                                                |                   |                  |                 |                     |                       |
|-------|----------|--------------------------------------------------------------------------------|-------------------|------------------|-----------------|---------------------|-----------------------|
| 0.647 | 3307740  | Isoptricola variabilis 225<br>Propionibacterium freudenreichii subsp.shermanii | Isoptricola       | Actinobacteridae | Actinomycetales | Micrococcineae      | Promicromonosporaceae |
| 0.379 | 2616384  | CIRM-BIA1                                                                      | Propionibacterium | Actinobacteridae | Actinomycetales | Propionibacterineae | Propionibacteriaceae  |
| 0.384 | 2522885  | Propionibacterium acnes TypeIA2 P.acn17                                        | Propionibacterium | Actinobacteridae | Actinomycetales | Propionibacterineae | Propionibacteriaceae  |
| 0.386 | 2489623  | Propionibacterium acnes TypeIA2 P.acn33                                        | Propionibacterium | Actinobacteridae | Actinomycetales | Propionibacterineae | Propionibacteriaceae  |
| 0.388 | 2498766  | Propionibacterium acnes TypeIA2 P.acn31                                        | Propionibacterium | Actinobacteridae | Actinomycetales | Propionibacterineae | Propionibacteriaceae  |
| 0.389 | 2494578  | Propionibacterium acnes 266                                                    | Propionibacterium | Actinobacteridae | Actinomycetales | Propionibacterineae | Propionibacteriaceae  |
| 0.389 | 2560282  | Propionibacterium acnes 6609                                                   | Propionibacterium | Actinobacteridae | Actinomycetales | Propionibacterineae | Propionibacteriaceae  |
| 0.389 | 2560265  | Propionibacterium acnes KPA171202                                              | Propionibacterium | Actinobacteridae | Actinomycetales | Propionibacterineae | Propionibacteriaceae  |
| 0.396 | 2519002  | Propionibacterium acnes C1                                                     | Propionibacterium | Actinobacteridae | Actinomycetales | Propionibacterineae | Propionibacteriaceae  |
| 0.399 | 2495334  | Propionibacterium acnes SK137                                                  | Propionibacterium | Actinobacteridae | Actinomycetales | Propionibacterineae | Propionibacteriaceae  |
| 0.417 | 3656170  | Propionibacterium acidipropionici ATCC 4875                                    | Propionibacterium | Actinobacteridae | Actinomycetales | Propionibacterineae | Propionibacteriaceae  |
| 0.544 | 3449360  | Propionibacterium propionicum F0230a                                           | Propionibacterium | Actinobacteridae | Actinomycetales | Propionibacterineae | Propionibacteriaceae  |
| 0.555 | 2494190  | Propionibacterium acnes HL096PA1                                               | Propionibacterium | Actinobacteridae | Actinomycetales | Propionibacterineae | Propionibacteriaceae  |
| 0.649 | 5683123  | Microlunatus phosphovorius NM-1 <sup>T</sup>                                   | Microlunatus      | Actinobacteridae | Actinomycetales | Propionibacterineae | Propionibacteriaceae  |
| 0.315 | 4189976  | Thermobispora bispora DSM 43833 <sup>T</sup>                                   | Thermobispora     | Actinobacteridae | Actinomycetales | Pseudonocardineae   | Pseudonocardiaceae    |
| 0.467 | 8961318  | Amycolatopsis japonica MG417-CF17 <sup>T</sup>                                 | Amycolatopsis     | Actinobacteridae | Actinomycetales | Pseudonocardineae   | Pseudonocardiaceae    |
| 0.478 | 8948591  | Amycolatopsis orientalis HCCB10007                                             | Amycolatopsis     | Actinobacteridae | Actinomycetales | Pseudonocardineae   | Pseudonocardiaceae    |
| 0.484 | 8248144  | Actinosynnema mirum DSM 43827 <sup>T</sup>                                     | Actinosynnema     | Actinobacteridae | Actinomycetales | Pseudonocardineae   | Pseudonocardiaceae    |
| 0.491 | 4308349  | Saccharomonospora viridis DSM 43017 <sup>T</sup>                               | Saccharomonospora | Actinobacteridae | Actinomycetales | Pseudonocardineae   | Pseudonocardiaceae    |
| 0.495 | 7237391  | Amycolatopsis methanolia 239 <sup>T</sup>                                      | Amycolatopsis     | Actinobacteridae | Actinomycetales | Pseudonocardineae   | Pseudonocardiaceae    |
| 0.5   | 9360653  | Saccharothrix espanaensis DSM 44229 <sup>T</sup>                               | Saccharothrix     | Actinobacteridae | Actinomycetales | Pseudonocardineae   | Pseudonocardiaceae    |
| 0.503 | 10236779 | Amycolatopsis mediterranei S699                                                | Amycolatopsis     | Actinobacteridae | Actinomycetales | Pseudonocardineae   | Pseudonocardiaceae    |
| 0.503 | 10236715 | Amycolatopsis mediterranei U32                                                 | Amycolatopsis     | Actinobacteridae | Actinomycetales | Pseudonocardineae   | Pseudonocardiaceae    |
| 0.504 | 10246864 | Amycolatopsis mediterranei RB                                                  | Amycolatopsis     | Actinobacteridae | Actinomycetales | Pseudonocardineae   | Pseudonocardiaceae    |
| 0.504 | 10246920 | Amycolatopsis mediterranei S699                                                | Amycolatopsis     | Actinobacteridae | Actinomycetales | Pseudonocardineae   | Pseudonocardiaceae    |
| 0.504 | 8212805  | Saccharopolyspora erythraea NRRL 2338 <sup>T</sup>                             | Saccharopolyspora | Actinobacteridae | Actinomycetales | Pseudonocardineae   | Pseudonocardiaceae    |
| 0.506 | 7096571  | Pseudonocardia dioxanivorans CB1190 <sup>T</sup>                               | Pseudonocardia    | Actinobacteridae | Actinomycetales | Pseudonocardineae   | Pseudonocardiaceae    |
| 0.355 | 4253413  | Sanguibacter keddieii DSM 10542 <sup>T</sup>                                   | Sanguibacter      | Actinobacteridae | Actinomycetales | Micrococcineae      | Sanguibacteraceae     |
| 0.522 | 3157527  | Segniliparus rotundus DSM 44985 <sup>T</sup>                                   | Segniliparus      | Actinobacteridae | Actinomycetales | Corynebacterineae   | Segniliparaceae       |
| 0.836 | 10657107 | Streptomyces violaceusniger Tu 4113                                            | Streptomyces      | Actinobacteridae | Actinomycetales | Streptomycineae     | Streptomycetaceae     |
| 0.666 | 5639016  | Thermomonospora curvata DSM 43183 <sup>T</sup>                                 | Thermomonospora   | Actinobacteridae | Actinomycetales | Streptosporangineae | Thermomonosporaceae   |
| 0.497 | 4379918  | Tsukamurella paurometabola DSM 20162 <sup>T</sup>                              | Tsukamurella      | Actinobacteridae | Actinomycetales | Corynebacterineae   | Tsukamurellaceae      |

The ratio represents the relative chromosomal positions of the genomes normalized to 0.0–1.0 with *oriC* located at the both ends. This conserved gene is located in the middle of the circular chromosomes (*i.e.*, close to the 0.5 locus) in the species belonging to mainly four families including *Pseudonocardiaceae* (13 genomes, red, except genus *Thermobispora*), *Corynebacteriaceae* (50 genomes, green), *Micrococcaceae* (9 genomes, blue) and *Mycobacteriaceae* (59 genomes, cyan).

All the genomes are available at <ftp://ftp.ncbi.nlm.nih.gov/genomes/Bacteria/>.

**A**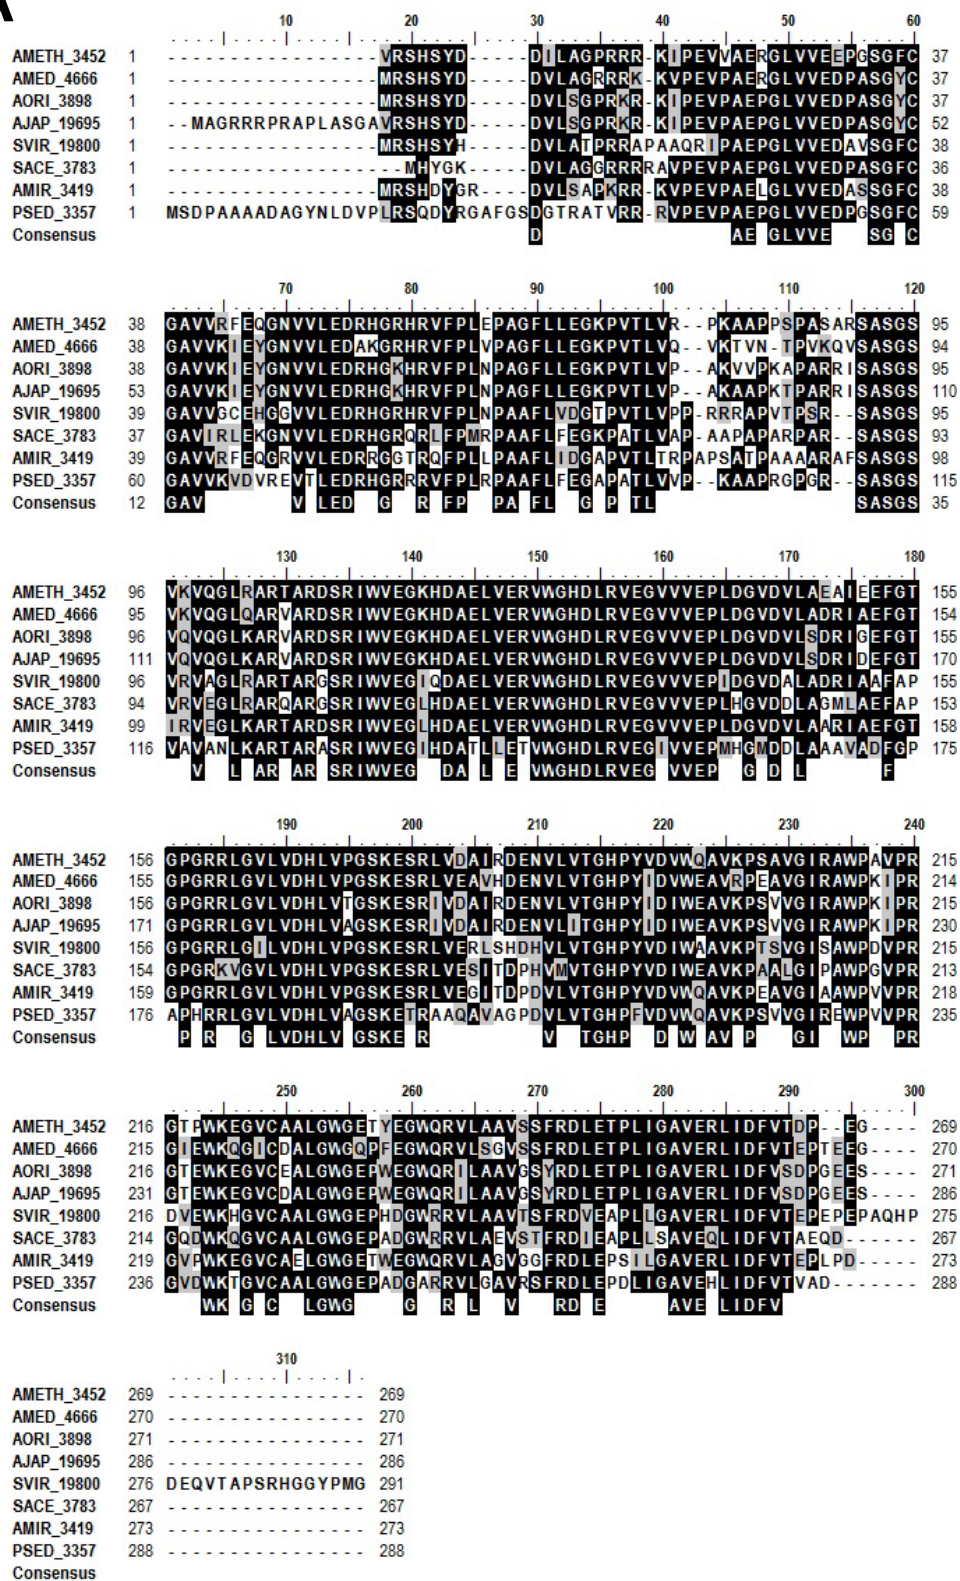**B**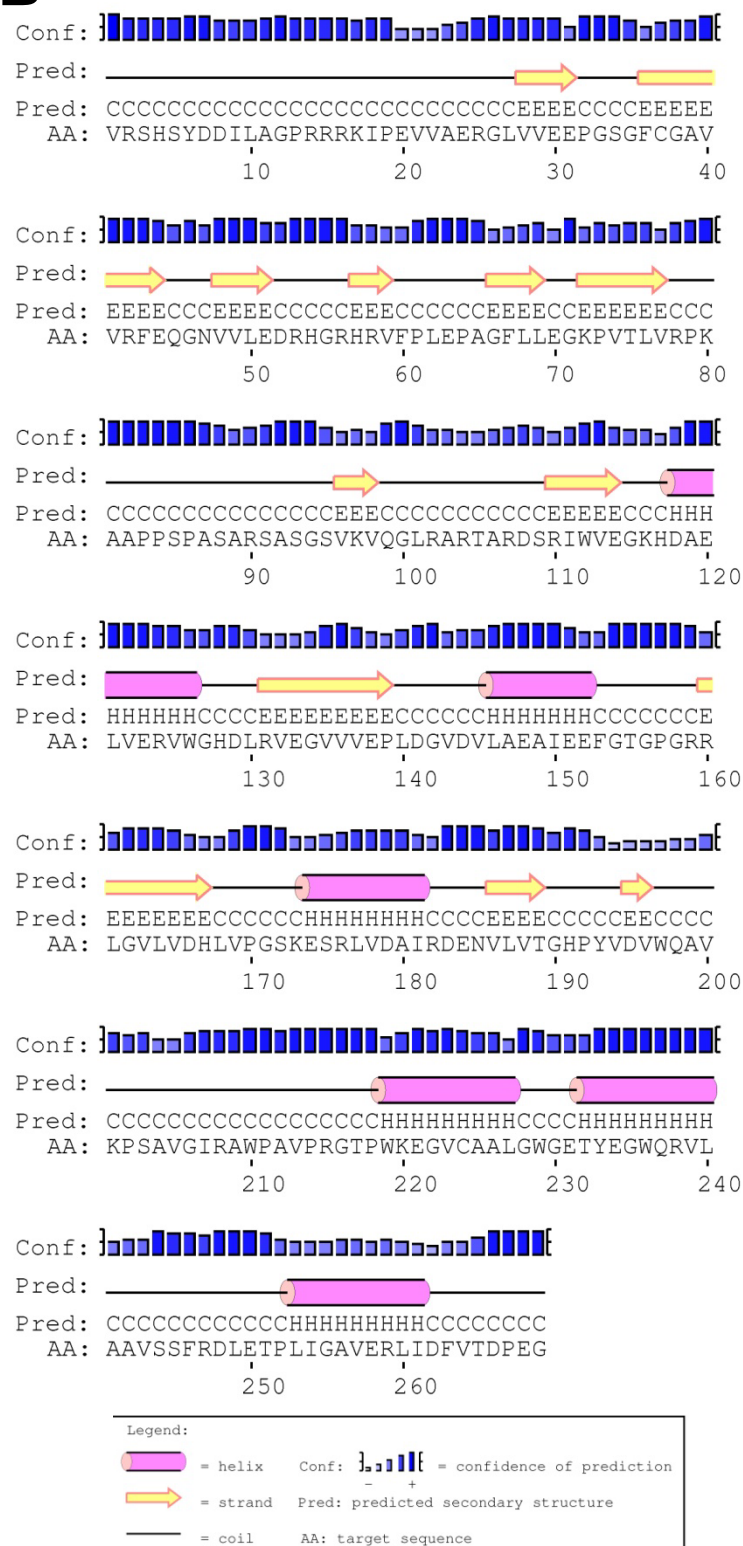

**Figure S1. A. The alignment of protein AMETH\_3452 and its orthologs in *Pseudonocardiaceae*. B. The secondary structure prediction of the conserved CDS (AMETH\_3452).** The conserved protein is restricted to *Actinobacteria* after blast with NR database and all genome sequences and it belongs to pfam11296 by matching with NCBI's conserved domain database. In panel A, the hypothetical protein of 269 amino acid residues (AMETH\_3452) and its orthologous protein from sequenced genomes belonging to the family *Pseudonocardiaceae* (AMED\_4666, AORI\_3898, AJAP\_19695, SVIR\_19800, SACE\_3783, AMIR\_3419, and PSED\_3357) were aligned by Clustal X. In panel B, the secondary structure of conserved CDS in *A. methanolica* 239 was predicted by PSIPRED server (Buchan *et al.*, 2013). In addition, the protein was predicted cytoplasmic using PSLpred (Bhasin *et al.*, 2005), Psortb (Yu *et al.*, 2010) and SubLoc (Chen *et al.*, 2006), no transmembrane helices was found based on TMPred analysis ([http://embnet.vital-it.ch/software/TMPRED\\_form.html](http://embnet.vital-it.ch/software/TMPRED_form.html)) and no signal peptide based on SignalP-4.1 (Petersen *et al.*, 2011)

#### Reference:

- Bhasin, M., Garg, A., Raghava, G.P., 2005. PSLpred: prediction of subcellular localization of bacterial proteins. *Bioinformatics* 21, 2522-2524.
- Buchan, D.W., Minnici, F., Nugent, T.C., Bryson, K., Jones, D.T., 2013. Scalable web services for the PSIPRED Protein Analysis Workbench. *Nucleic Acids Res* 41, W349-357.
- Chen, H., Huang, N., Sun, Z., 2006. SubLoc: a server/client suite for protein subcellular location based on SOAP. *Bioinformatics* 22, 376-377.
- Petersen, T.N., Brunak, S., von Heijne, G., Nielsen, H., 2011. SignalP 4.0: discriminating signal peptides from transmembrane regions. *Nature methods* 8, 785-786.
- Yu, N.Y., Wagner, J.R., Laird, M.R., Melli, G., Rey, S., Lo, R., Dao, P., Sahinalp, S.C., Ester, M., Foster, L.J., Brinkman, F.S., 2010. PSORTb 3.0: improved protein subcellular localization prediction with refined localization subcategories and predictive capabilities for all prokaryotes. *Bioinformatics* 26, 1608-1615.

**Figure S2.** The differences between the sequences of the two versions (AQL00000000.1 and CP009110) of *A.methanolica* 239<sup>T</sup>

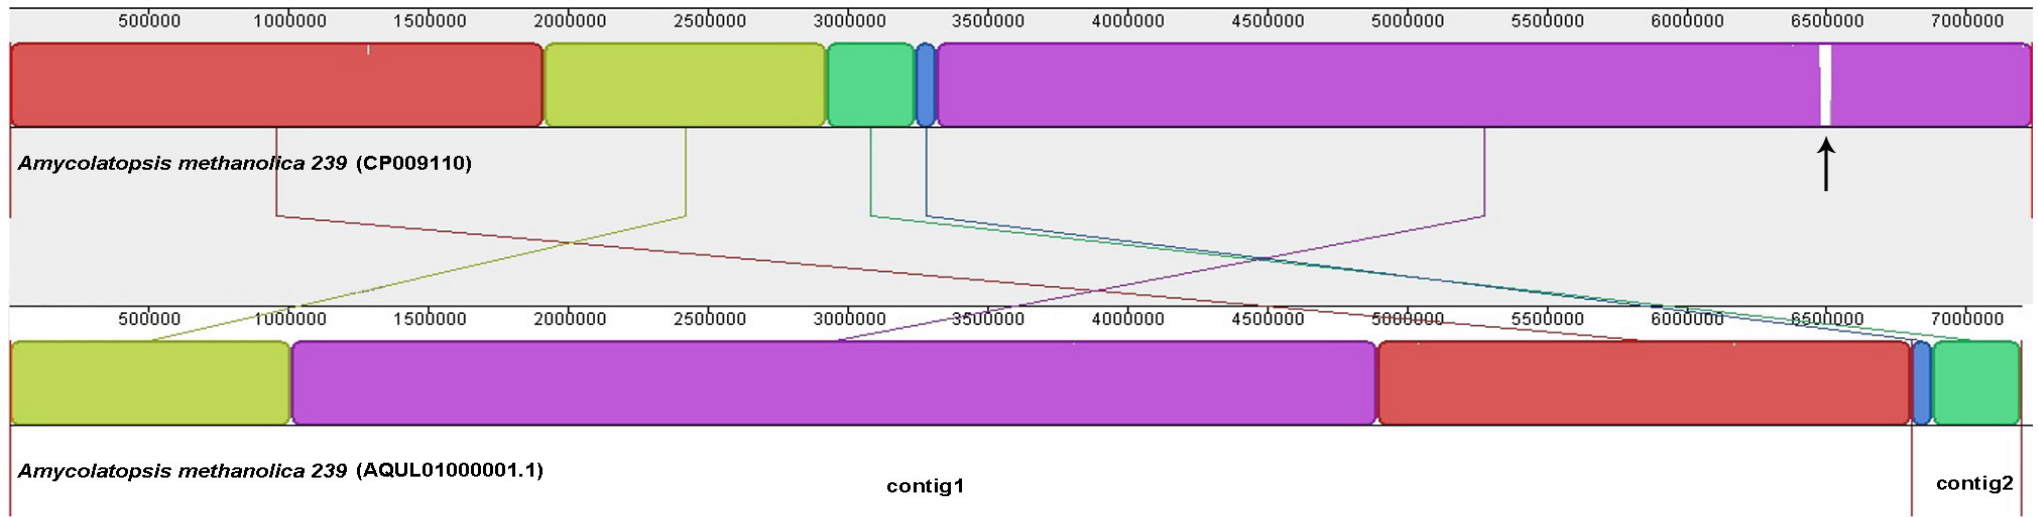

Arrow represents a copy of the prophage which is a tandem repeat in Strain 239<sup>T</sup> (CP009110).

**Table S5.** Genes related to the synthesis and transport of several compatible solutes in the AMS *A. methanolica* 239<sup>T</sup>, *Amycolatopsis* sp. ATCC 39116 and *A. thermoflava* N1165<sup>T</sup> versus ATS *A. taiwanensis* 0345M-7<sup>T</sup>

| <b>AMS</b>                                |                                       | <b>ATS</b>            |                       | <b>gene</b>  | <b>product</b>                                                |
|-------------------------------------------|---------------------------------------|-----------------------|-----------------------|--------------|---------------------------------------------------------------|
| <i>A. methanolica</i>                     | <i>Amycolatopsis</i><br>sp. ATCC39116 | <i>A. thermoflava</i> | <i>A. taiwanensis</i> |              |                                                               |
| <b>ectoine/hydroxyectoine transporter</b> |                                       |                       |                       |              |                                                               |
| AMETH_1367                                | Y                                     | Y                     | Y                     | <i>hisJ</i>  | ectoine/hydroxyectoine ABC transporter solute-binding protein |
| AMETH_1368                                | Y                                     | Y                     | Y                     | <i>hisM</i>  | ectoine/hydroxyectoine ABC transporter permease EhuC          |
| AMETH_1369                                | Y                                     | Y                     | Y                     | <i>hisM</i>  | ectoine/hydroxyectoine ABC transporter, permease protein      |
| AMETH_1370                                | Y                                     | Y                     | Y                     | <i>ehuA</i>  | ectoine/hydroxyectoine ABC transporter, ATP-binding protein   |
| AMETH_5002                                | Y                                     | Y                     | Y                     | <i>hisM</i>  | ectoine/hydroxyectoine ABC transporter, permease EhuD         |
|                                           | Y                                     | Y                     | -                     |              | nitrate/sulfonate/bicarbonate ABC transporter ATPase/         |
| AMETH_2747                                |                                       |                       |                       | <i>ssuB</i>  | ectoine/hydroxyectoine ABC transporter                        |
| <b>Ectoine/hydroxyectoine synthesis</b>   |                                       |                       |                       |              |                                                               |
| AMETH_6462                                | Y                                     | Y                     | Y                     | <i>ectD</i>  | ectoine hydroxylase                                           |
| AMETH_6463                                | Y                                     | Y                     | Y                     | <i>ectC</i>  | L-ectoine synthase                                            |
| AMETH_6464                                | Y                                     | Y                     | Y                     | <i>ectB</i>  | diaminobutyrate/2-oxoglutarate aminotransferase               |
| AMETH_6465                                | Y                                     | Y                     | Y                     | <i>ectA</i>  | L-2,4-diaminobutyric acid acetyltransferase                   |
| <b>glycine betaine transporter</b>        |                                       |                       |                       |              |                                                               |
| AMETH_0110                                | Y                                     | Y                     | Y                     | <i>opuBB</i> | ABC quaternary amine transporter                              |
| AMETH_0111                                | Y                                     | Y                     | Y                     | <i>opuBA</i> | proline/glycine/betaine ABC transporter ATPase                |
| AMETH_5762                                | Y                                     | Y                     | Y                     | <i>opuBA</i> | D-methionine ABC transporter, ATP-binding protein             |
| AMETH_0112                                | Y                                     | Y                     | Y                     | <i>opuBB</i> | ABC-type transporter, integral membrane subunit               |
| AMETH_0406                                | Y                                     | Y                     | Y                     | <i>opuBB</i> | proline/glycine/betaine ABC transporter permease              |
| AMETH_0407                                | Y                                     | Y                     | Y                     | <i>opuBB</i> | proline/glycine/betaine ABC transporter permease              |
| AMETH_6704                                | Y                                     | Y                     | Y                     | <i>proP</i>  | L-Proline/Glycine betaine transporter ProP                    |
| AMETH_0113                                | Y                                     | Y                     | Y                     | <i>opuC</i>  | glycine/betaine ABC transporter periplasmic protein           |
| AMETH_0408                                | Y                                     | Y                     | Y                     | <i>opuC</i>  | glycine/betaine ABC transporter periplasmic protein           |
| AMETH_5526                                | Y                                     | Y                     | -                     | <i>proP</i>  | proline/betaine transporter                                   |
| AMETH_6721                                | Y                                     | Y                     | -                     | <i>proP</i>  | proline/betaine transporter                                   |
| AMETH_3300                                | Y                                     | Y                     | -                     | <i>betP</i>  | choline/carnitine/betaine transporter                         |
| AMETH_4479                                | Y                                     | Y                     | -                     | <i>betP</i>  | choline/carnitine/betaine transporter                         |
| <b>glycine betaine metabolism</b>         |                                       |                       |                       |              |                                                               |
| AMETH_4499                                | Y                                     | Y                     | Y                     | <i>betA</i>  | choline dehydrogenase                                         |
| AMETH_4960                                | Y                                     | Y                     | Y                     | <i>putA</i>  | betaine aldehyde dehydrogenase                                |
| AMETH_4497                                | Y                                     | Y                     | Y                     | <i>putA</i>  | betaine aldehyde dehydrogenase                                |
| AMETH_0838                                | Y                                     | Y                     | Y                     | <i>putA</i>  | betaine aldehyde dehydrogenase                                |
| AMETH_5372                                | Y                                     | Y                     | -                     | <i>putA</i>  | betaine aldehyde dehydrogenase                                |
| AMETH_0085                                | Y                                     | Y                     | -                     | <i>putA</i>  | betaine aldehyde dehydrogenase                                |
| AMETH_5920                                | Y                                     | Y                     | -                     | <i>putA</i>  | betaine aldehyde dehydrogenase                                |
| AMETH_5579                                | Y                                     | Y                     | -                     | <i>putA</i>  | betaine aldehyde dehydrogenase                                |
| AMETH_2645                                | Y                                     | Y                     | -                     | <i>putA</i>  | betaine aldehyde dehydrogenase                                |
| <b>trehalose synthesis</b>                |                                       |                       |                       |              |                                                               |
| AMETH_2758                                | Y                                     | Y                     | -                     | <i>treS</i>  | maltose alpha-D-glucosyltransferase                           |
| AMETH_2761                                | Y                                     | Y                     | -                     | <i>treZ</i>  | malto-oligosyltrehalose trehalohydrolase                      |
| AMETH_2762                                | Y                                     | Y                     | -                     | <i>treY</i>  | maltooligosyl trehalose synthase                              |
| AMETH_2559                                | Y                                     | Y                     | Y                     | <i>terP</i>  | trehalose phosphorylase                                       |
| AMETH_6507                                | Y                                     | Y                     | Y                     | <i>otsA</i>  | alpha, alpha-trehalose-phosphate synthase                     |
| AMETH_6508                                | Y                                     | Y                     | Y                     | <i>otsB</i>  | trehalose-phosphatase                                         |

**Figure S3.** Neighbour-joining phylogenetic tree based on the fifteen 16S rDNA sequences of *A. orientalis*, *A. mediterranei*, *A. methanolica* and *A. japonica* with 16S rRNA genes from other 55 *Amycolatopsis* species.

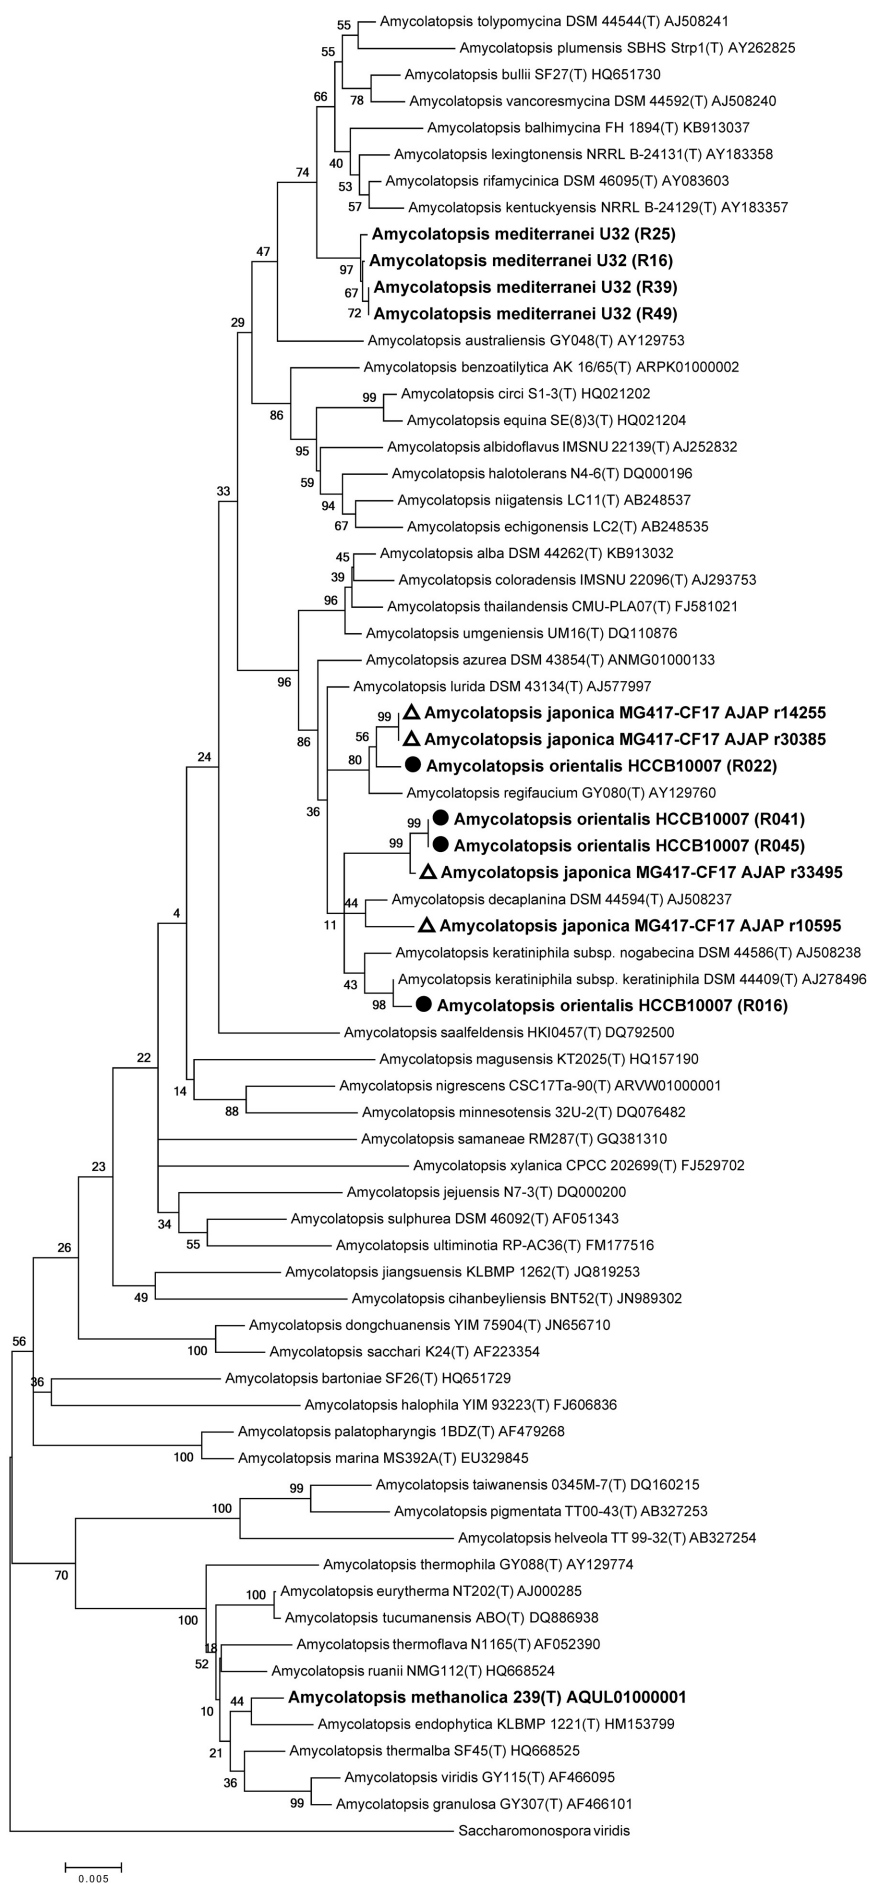

**Figure S4.** phylogenetic tree for 62 type strains of the genus *Amycolatopsis*, 11 type strains of the genus *Saccharomonospora* and 13 type strains of the genus *Prauserella* based on 16S rDNA sequences.

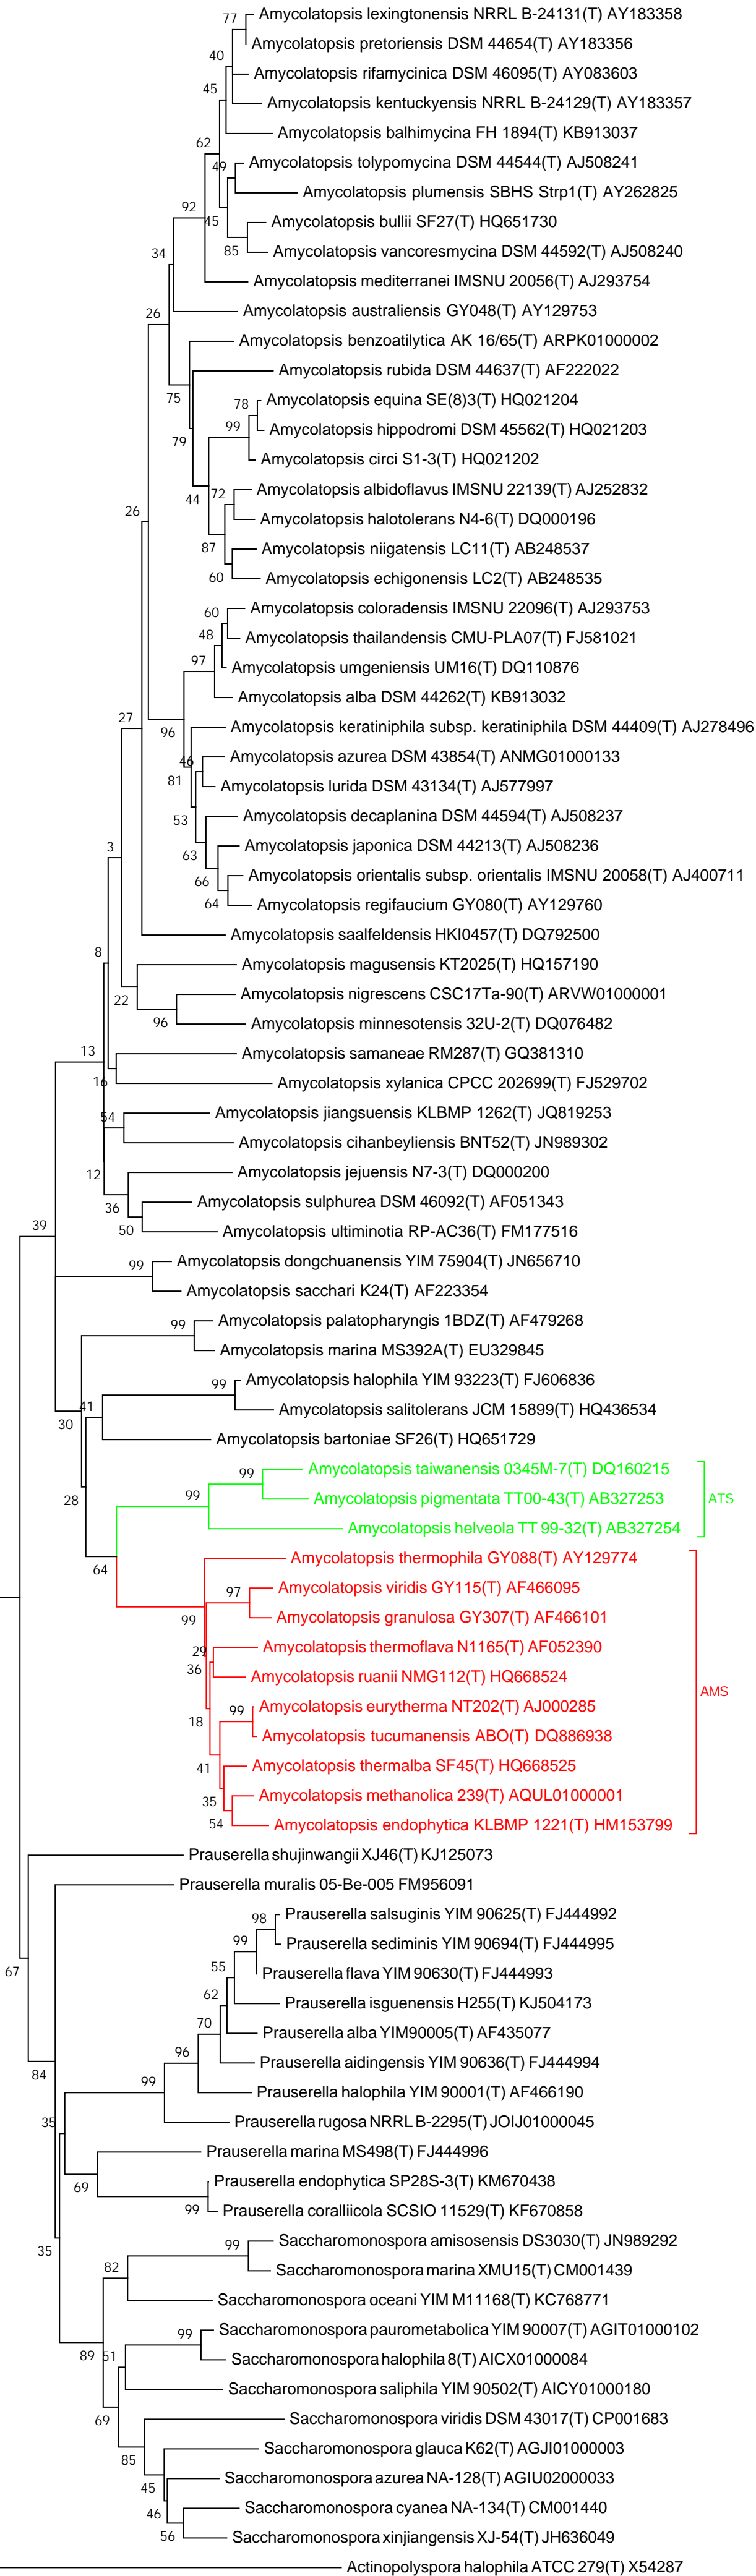

0.01

**Figure S5.** The phylogenetic trees for 18 type strains of the genus *Amycolatopsis* and *Saccharomonospora viridis*, *Saccharopolyspora erythraea* and *Actinosynnema mirum*. These trees were constructed using the neighbour-joining method based on the *gyrB* (A), 16S-*gyrB* (B), *recN* (C) and 16S-*recN* (D) gene sequences. The percentage bootstrap values of 1,000 replications are shown at each node. *Pseudonocardia dioxanivorans* CB1190<sup>T</sup> was used as an outgroup. Groups A–F and J indicate the conserved clusters of strains.

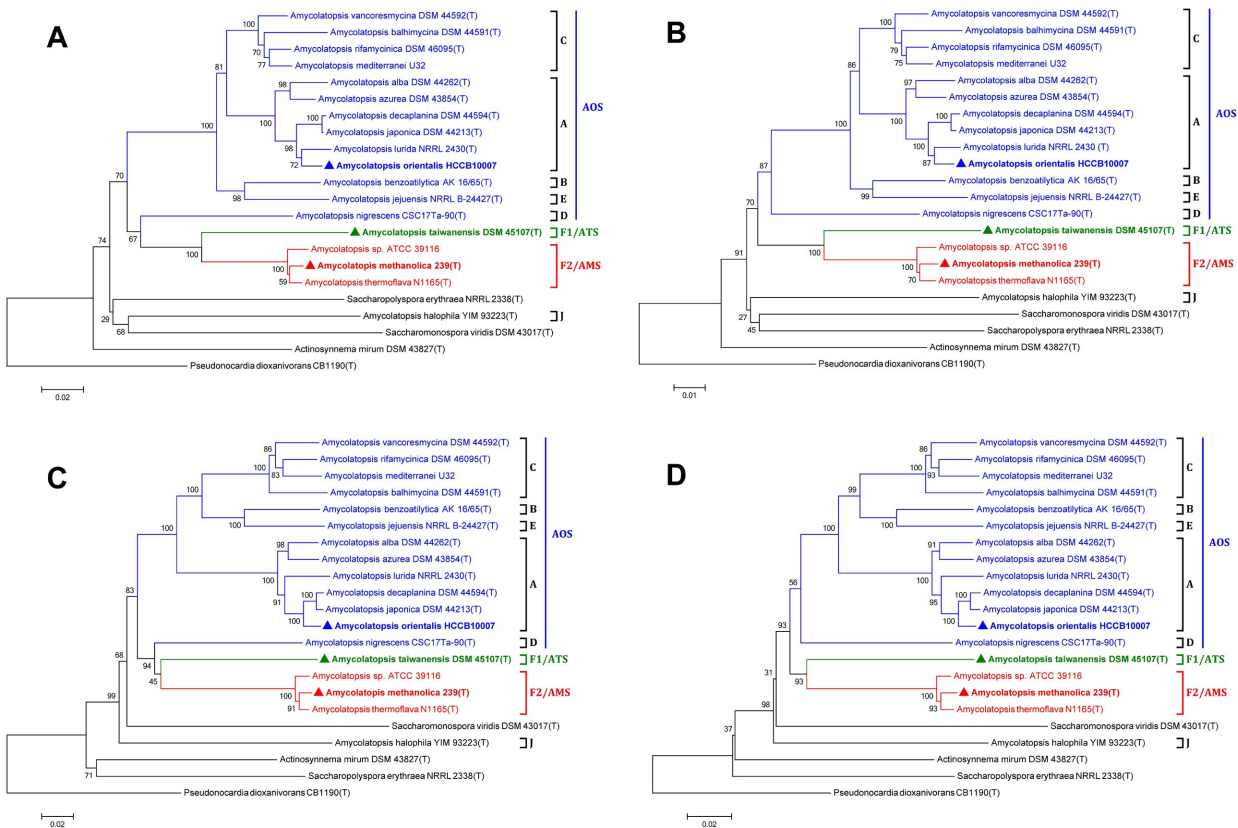



**Figure S6.** Phylogenetic tree of 13 AOS, 1 ATS and 3 AMS and Group J strains based on the head-tail linked 95 core protein sequences. All the sequences were obtained from the NCBI database. Subclades of the A-F and J grouping and AOS/ATS/AMS classification are shown. Red branches represent AMS and blue branches are AOS. Numbers at the nodes are the bootstrap values based on 1,000 replicates. Bootstrap values of above 60 % are shown at branch points. The tree was generated by using the maximum-likelihood method. The scale bar indicates 0.05 amino acid substitutions per amino acid position.

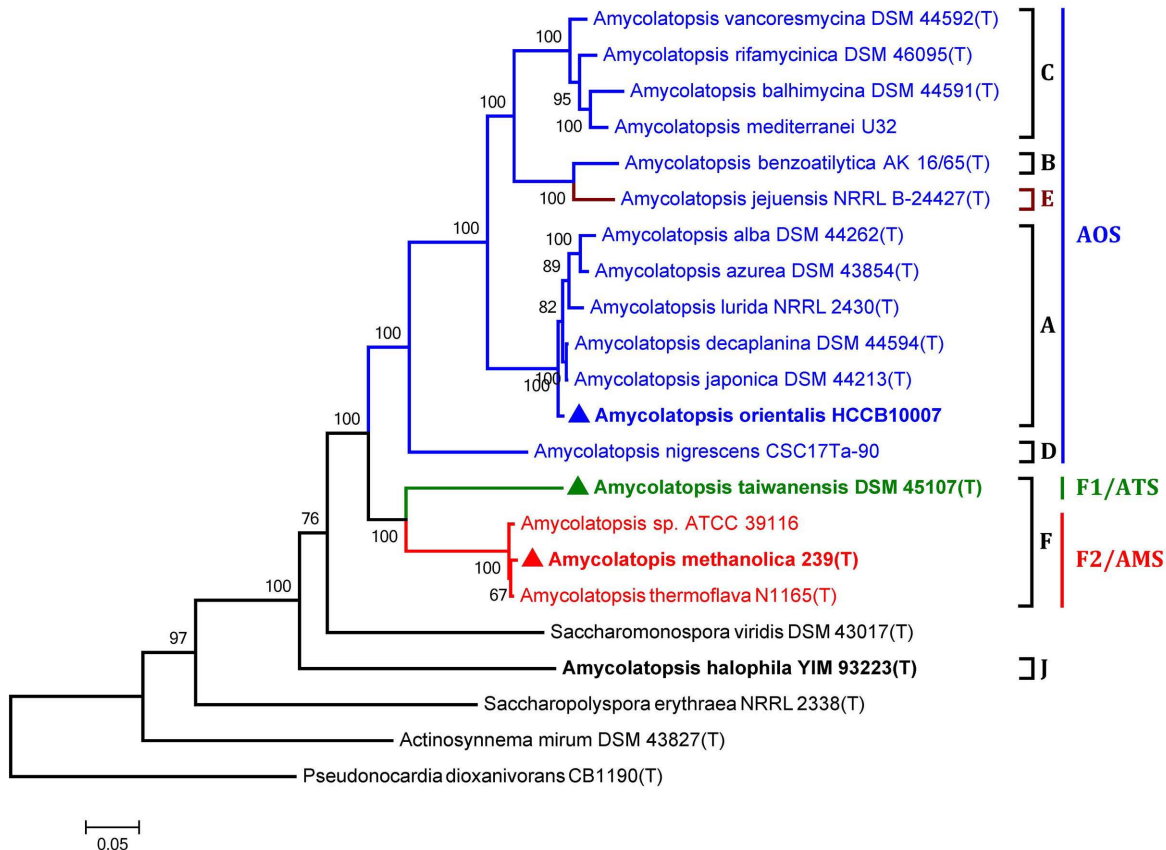

**Table S6.** 95 ortholog proteins in *A. methanolica* 239<sup>T</sup>, *A. mediterranei* U32, *A. orientalis* HCCB10007 and *A. japonica* MG417-CF17<sup>T</sup> used to generate phylogenetic trees.

| <i>A.methanolica</i><br>239 <sup>T</sup> | <i>A.mediterranei</i><br>U32 | <i>A.orientalis</i><br>HCCB10007 | <i>A.japonica</i><br>MG417-CF17 <sup>T</sup> | COG      | category | Product                                                    |
|------------------------------------------|------------------------------|----------------------------------|----------------------------------------------|----------|----------|------------------------------------------------------------|
| AMETH_0001                               | AMED_0001                    | AORI_0001                        | AJAP_00005                                   | COG0593L | L        | chromosomal replication initiator protein DnaA             |
| AMETH_0007                               | AMED_0004                    | AORI_0004                        | AJAP_00025                                   | COG1195L | L        | DNA replication and repair protein RecF                    |
| AMETH_0010                               | AMED_0007                    | AORI_0007                        | AJAP_00040                                   | COG0188L | L        | DNA gyrase subunit A                                       |
| AMETH_0624                               | AMED_0594                    | AORI_0619                        | AJAP_36525                                   | COG0250K | K        | transcription antiterminator NusG                          |
| AMETH_0625                               | AMED_0595                    | AORI_0620                        | AJAP_36520                                   | COG0080J | J        | 50S ribosomal protein L11                                  |
| AMETH_0626                               | AMED_0596                    | AORI_0621                        | AJAP_36515                                   | COG0081J | J        | 50S ribosomal protein L1                                   |
| AMETH_0628                               | AMED_0599                    | AORI_0624                        | AJAP_36500                                   | COG0244J | J        | 50S ribosomal protein L10                                  |
| AMETH_0629                               | AMED_0600                    | AORI_0625                        | AJAP_36495                                   | COG0222J | J        | 50S ribosomal protein L7/L12                               |
| AMETH_0647                               | AMED_0672                    | AORI_0652                        | AJAP_36355                                   | COG0048J | J        | 30S ribosomal protein S12                                  |
| AMETH_0648                               | AMED_0673                    | AORI_0653                        | AJAP_36350                                   | COG0049J | J        | 30S ribosomal protein S7                                   |
| AMETH_0652                               | AMED_0677                    | AORI_0657                        | AJAP_36330                                   | COG0087J | J        | 50S ribosomal protein L3                                   |
| AMETH_0653                               | AMED_0678                    | AORI_0658                        | AJAP_36325                                   | COG0088J | J        | 50S ribosomal protein L4                                   |
| AMETH_0654                               | AMED_0679                    | AORI_0659                        | AJAP_36320                                   | COG0089J | J        | 50S ribosomal protein L23                                  |
| AMETH_0655                               | AMED_0680                    | AORI_0660                        | AJAP_36315                                   | COG0090J | J        | 50S ribosomal protein L2                                   |
| AMETH_0656                               | AMED_0681                    | AORI_0661                        | AJAP_36310                                   | COG0185J | J        | 30S ribosomal protein S19                                  |
| AMETH_0657                               | AMED_0682                    | AORI_0662                        | AJAP_36305                                   | COG0091J | J        | 50S ribosomal protein L22                                  |
| AMETH_0658                               | AMED_0683                    | AORI_0663                        | AJAP_36300                                   | COG0092J | J        | 30S ribosomal protein S3                                   |
| AMETH_0659                               | AMED_0684                    | AORI_0664                        | AJAP_36295                                   | COG0197J | J        | 50S ribosomal protein L16                                  |
| AMETH_0660                               | AMED_0685                    | AORI_0665                        | AJAP_36290                                   | COG0255J | J        | 50S ribosomal protein L29                                  |
| AMETH_0661                               | AMED_0686                    | AORI_0666                        | AJAP_36285                                   | COG0186J | J        | 30S ribosomal protein S17                                  |
| AMETH_0662                               | AMED_0687                    | AORI_0667                        | AJAP_36280                                   | COG0093J | J        | 50S ribosomal protein L14                                  |
| AMETH_0663                               | AMED_0688                    | AORI_0668                        | AJAP_36275                                   | COG0198J | J        | 50S ribosomal protein L24                                  |
| AMETH_0664                               | AMED_0689                    | AORI_0669                        | AJAP_36270                                   | COG0094J | J        | 50S ribosomal protein L5                                   |
| AMETH_0666                               | AMED_0691                    | AORI_0671                        | AJAP_36260                                   | COG0096J | J        | 30S ribosomal protein S8                                   |
| AMETH_0667                               | AMED_0692                    | AORI_0672                        | AJAP_36255                                   | COG0097J | J        | 50S ribosomal protein L6                                   |
| AMETH_0668                               | AMED_0693                    | AORI_0673                        | AJAP_36250                                   | COG0256J | J        | 50S ribosomal protein L18                                  |
| AMETH_0669                               | AMED_0694                    | AORI_0674                        | AJAP_36245                                   | COG0098J | J        | 30S ribosomal protein S5                                   |
| AMETH_0671                               | AMED_0696                    | AORI_0676                        | AJAP_36235                                   | COG0200J | J        | 50S ribosomal protein L15                                  |
| AMETH_0679                               | AMED_0704                    | AORI_0684                        | AJAP_36190                                   | COG0099J | J        | 30S ribosomal protein S13                                  |
| AMETH_0681                               | AMED_0706                    | AORI_0686                        | AJAP_36180                                   | COG0100J | J        | 30S ribosomal protein S11                                  |
| AMETH_0684                               | AMED_0709                    | AORI_0689                        | AJAP_36165                                   | COG0203J | J        | 50S ribosomal protein L17                                  |
| AMETH_0698                               | AMED_0726                    | AORI_0707                        | AJAP_36080                                   | COG0102J | J        | 50S ribosomal protein L13                                  |
| AMETH_0699                               | AMED_0727                    | AORI_0708                        | AJAP_36075                                   | COG0103J | J        | 30S ribosomal protein S9                                   |
| AMETH_0700                               | AMED_0728                    | AORI_0709                        | AJAP_36070                                   | COG1109G | G        | phosphoglucosaminemutase                                   |
| AMETH_0727                               | AMED_0762                    | AORI_0751                        | AJAP_35915                                   | COG0234O | O        | chaperonin GroES                                           |
| AMETH_0748                               | AMED_0782                    | AORI_0774                        | AJAP_35800                                   | COG0519F | F        | GMP synthase (glutamine-hydrolysing)                       |
| AMETH_0762                               | AMED_0798                    | AORI_0791                        | AJAP_35715                                   | COG0210L | L        | DNA helicase II/ATP-dependent DNA helicase                 |
| AMETH_0906                               | AMED_0993                    | AORI_0981                        | AJAP_34665                                   | COG0041F | F        | phosphoribosylaminoimidazole carboxylase catalytic subunit |
| AMETH_1139                               | AMED_1250                    | AORI_1247                        | AJAP_33335                                   | COG1186J | J        | peptide chain release factor RF-2                          |
| AMETH_1344                               | AMED_7790                    | AORI_6579                        | AJAP_06060                                   | COG0216J | J        | peptide chain release factor RF-1                          |

|            |           |           |            |           |    |                                                                    |
|------------|-----------|-----------|------------|-----------|----|--------------------------------------------------------------------|
| AMETH_1355 | AMED_7777 | AORI_6562 | AJAP_06145 | COG0056C  | C  | F-type H <sup>+</sup> -transporting ATPase subunit alpha           |
| AMETH_1357 | AMED_7775 | AORI_6560 | AJAP_06155 | COG0055C  | C  | F-type H <sup>+</sup> -transporting ATPase subunit beta            |
| AMETH_1485 | AMED_1669 | AORI_6253 | AJAP_08160 | COG0272L  | L  | DNA ligase (NAD <sup>+</sup> )                                     |
| AMETH_1550 | AMED_1753 | AORI_6117 | AJAP_08830 | COG1200LK | LK | ATP-dependent DNA helicase RecG                                    |
| AMETH_1565 | AMED_1796 | AORI_6081 | AJAP_09030 | COG0571K  | K  | ribonuclease III                                                   |
| AMETH_1622 | AMED_1954 | AORI_5924 | AJAP_09830 | COG0541U  | U  | signal recognition particle, subunit SRP54                         |
| AMETH_1626 | AMED_1958 | AORI_5920 | AJAP_09850 | COG0228J  | J  | 30S ribosomal protein S16                                          |
| AMETH_1628 | AMED_1960 | AORI_5918 | AJAP_09860 | COG0806J  | J  | 16S rRNA processing protein RimM                                   |
| AMETH_1630 | AMED_1963 | AORI_5916 | AJAP_09870 | COG0335J  | J  | 50S ribosomal protein L19                                          |
| AMETH_1640 | AMED_1973 | AORI_5906 | AJAP_09920 | COG0052J  | J  | 30S ribosomal protein S2                                           |
| AMETH_1641 | AMED_1974 | AORI_5905 | AJAP_09925 | COG0264J  | J  | elongation factor EF-Ts                                            |
| AMETH_1643 | AMED_1976 | AORI_5903 | AJAP_09935 | COG0233J  | J  | ribosome recycling factor                                          |
| AMETH_1732 | AMED_6742 | AORI_1963 | AJAP_29700 | COG0544O  | O  | trigger factor                                                     |
| AMETH_1778 | AMED_6705 | AORI_2002 | AJAP_29510 | COG0211J  | J  | 50S ribosomal protein L27                                          |
| AMETH_1779 | AMED_6704 | AORI_2003 | AJAP_29505 | COG0536R  | R  | GTP-binding protein Obg                                            |
| AMETH_1792 | AMED_6685 | AORI_2021 | AJAP_29425 | COG0268J  | J  | 30S ribosomal protein S20                                          |
| AMETH_1796 | AMED_6681 | AORI_2025 | AJAP_29405 | COG0481M  | M  | GTP-binding protein LepA                                           |
| AMETH_1928 | AMED_6624 | AORI_2078 | AJAP_29125 | COG0319R  | R  | metalloprotease                                                    |
| AMETH_1931 | AMED_6621 | AORI_2081 | AJAP_29110 | COG1159R  | R  | GTP-binding protein Era                                            |
| AMETH_1934 | AMED_6615 | AORI_2088 | AJAP_29075 | COG1381L  | L  | DNA repair protein RecO                                            |
| AMETH_1959 | AMED_6587 | AORI_2110 | AJAP_28960 | COG0358L  | L  | DNA primase                                                        |
| AMETH_2444 | AMED_6340 | AORI_2216 | AJAP_27810 | COG0195K  | K  | transcription elongation factor NusA                               |
| AMETH_2446 | AMED_6338 | AORI_2218 | AJAP_27805 | COG0532J  | J  | translation initiation factor IF-2                                 |
| AMETH_2448 | AMED_6336 | AORI_2220 | AJAP_27795 | COG0858J  | J  | ribosome-binding factor A                                          |
| AMETH_2459 | AMED_6323 | AORI_2230 | AJAP_27740 | COG0130J  | J  | tRNApseudouridine synthase B                                       |
| AMETH_2463 | AMED_6319 | AORI_2234 | AJAP_27720 | COG0184J  | J  | 30S ribosomal protein S15                                          |
| AMETH_2496 | AMED_6283 | AORI_2265 | AJAP_27535 | COG0558I  | I  | CDP-diacylglycerol--glycerol-3-phosphate 3-phosphatidyltransferase |
| AMETH_2519 | AMED_6260 | AORI_2290 | AJAP_27395 | COG0275M  | M  | S-adenosyl-methyltransferase                                       |
| AMETH_2525 | AMED_6253 | AORI_2296 | AJAP_27365 | COG0771M  | M  | UDP-N-acetylmuramoylalanine--D-glutamate ligase                    |
| AMETH_2550 | AMED_2971 | AORI_5593 | AJAP_11515 | COG0564J  | J  | ribosomal large subunit pseudouridine synthase D                   |
| AMETH_2615 | AMED_6117 | AORI_5144 | AJAP_13760 | COG0556L  | L  | excinuclease ABC subunit B                                         |
| AMETH_2669 | AMED_6055 | AORI_5070 | AJAP_14140 | COG0291J  | J  | 50S ribosomal protein L35                                          |
| AMETH_2670 | AMED_6054 | AORI_5069 | AJAP_14145 | COG0292J  | J  | 50S ribosomal protein L20                                          |
| AMETH_2672 | AMED_6051 | AORI_5067 | AJAP_14155 | COG0016J  | J  | phenylalanyl-tRNA synthetase alpha chain                           |
| AMETH_2870 | AMED_5304 | AORI_4427 | AJAP_16660 | COG0217S  | S  | hypothetical protein                                               |
| AMETH_2873 | AMED_5300 | AORI_4423 | AJAP_16680 | COG0632L  | L  | holliday junction DNA helicase RuvA                                |
| AMETH_2874 | AMED_5299 | AORI_4422 | AJAP_16685 | COG2255L  | L  | holliday junction DNA helicase RuvB                                |
| AMETH_2958 | AMED_6138 | AORI_5164 | AJAP_13650 | COG0749L  | L  | DNA polymerase I                                                   |
| AMETH_2970 | AMED_6127 | AORI_5151 | AJAP_13715 | COG0539J  | J  | 30S ribosomal protein S1                                           |
| AMETH_4102 | AMED_2800 | AORI_2787 | AJAP_24855 | COG0149G  | G  | triosephosphate isomerase                                          |
| AMETH_4133 | AMED_2764 | AORI_2755 | AJAP_25060 | COG0223J  | J  | methionyl-tRNA formyltransferase                                   |
| AMETH_4136 | AMED_2759 | AORI_2752 | AJAP_25075 | COG1198L  | L  | primosomal protein N'/primosome assembly protein PriA              |
| AMETH_4139 | AMED_2756 | AORI_2749 | AJAP_25090 | COG1758K  | K  | DNA-directed RNA polymerase subunit omega                          |

|            |           |           |            |          |   |                                                     |
|------------|-----------|-----------|------------|----------|---|-----------------------------------------------------|
| AMETH_4140 | AMED_2755 | AORI_2748 | AJAP_25095 | COG0194F | F | guanylate kinase                                    |
| AMETH_4151 | AMED_2741 | AORI_2737 | AJAP_25150 | COG0231J | J | elongation factor EF-P                              |
| AMETH_4177 | AMED_2714 | AORI_2704 | AJAP_25300 | COG0816L | L | holliday junction resolvase                         |
| AMETH_5840 | AMED_8047 | AORI_6869 | AJAP_04755 | COG0012J | J | translation-associated GTPase                       |
| AMETH_5969 | AMED_8234 | AORI_7025 | AJAP_04015 | COG1207M | M | N-acetylglucosamine-1-phosphate uridylyltransferase |
| AMETH_5985 | AMED_8248 | AORI_7038 | AJAP_03950 | COG0030J | J | dimethyladenosinetransferase                        |
| AMETH_6517 | AMED_8685 | AORI_7442 | AJAP_38915 | COG0566J | J | RNA methyltransferase YjfH                          |
| AMETH_6684 | AMED_8911 | AORI_7684 | AJAP_40065 | COG0353L | L | recombination protein RecR                          |
| AMETH_6687 | AMED_8918 | AORI_7690 | AJAP_40090 | COG2812L | L | DNA polymerase III subunits gamma/tau               |
| AMETH_7014 | AMED_9296 | AORI_8045 | AJAP_41935 | COG0360J | J | 30S ribosomal protein S6                            |
| AMETH_7017 | AMED_9299 | AORI_8048 | AJAP_41950 | COG0359J | J | 50S ribosomal protein L9                            |
| AMETH_7054 | AMED_9346 | AORI_8100 | AJAP_42215 | COG0617J | J | poly(A) polymerase                                  |

The Cog annotation was built by BLAST against the Clusters of Orthologous Groups (COGs) Database:

<http://www.ncbi.nlm.nih.gov/COG/>.

**Figure S7.** Maximum-likelihood phylogenetic tree based on the 95 core protein sequences of 123 *Actinobacteria* species

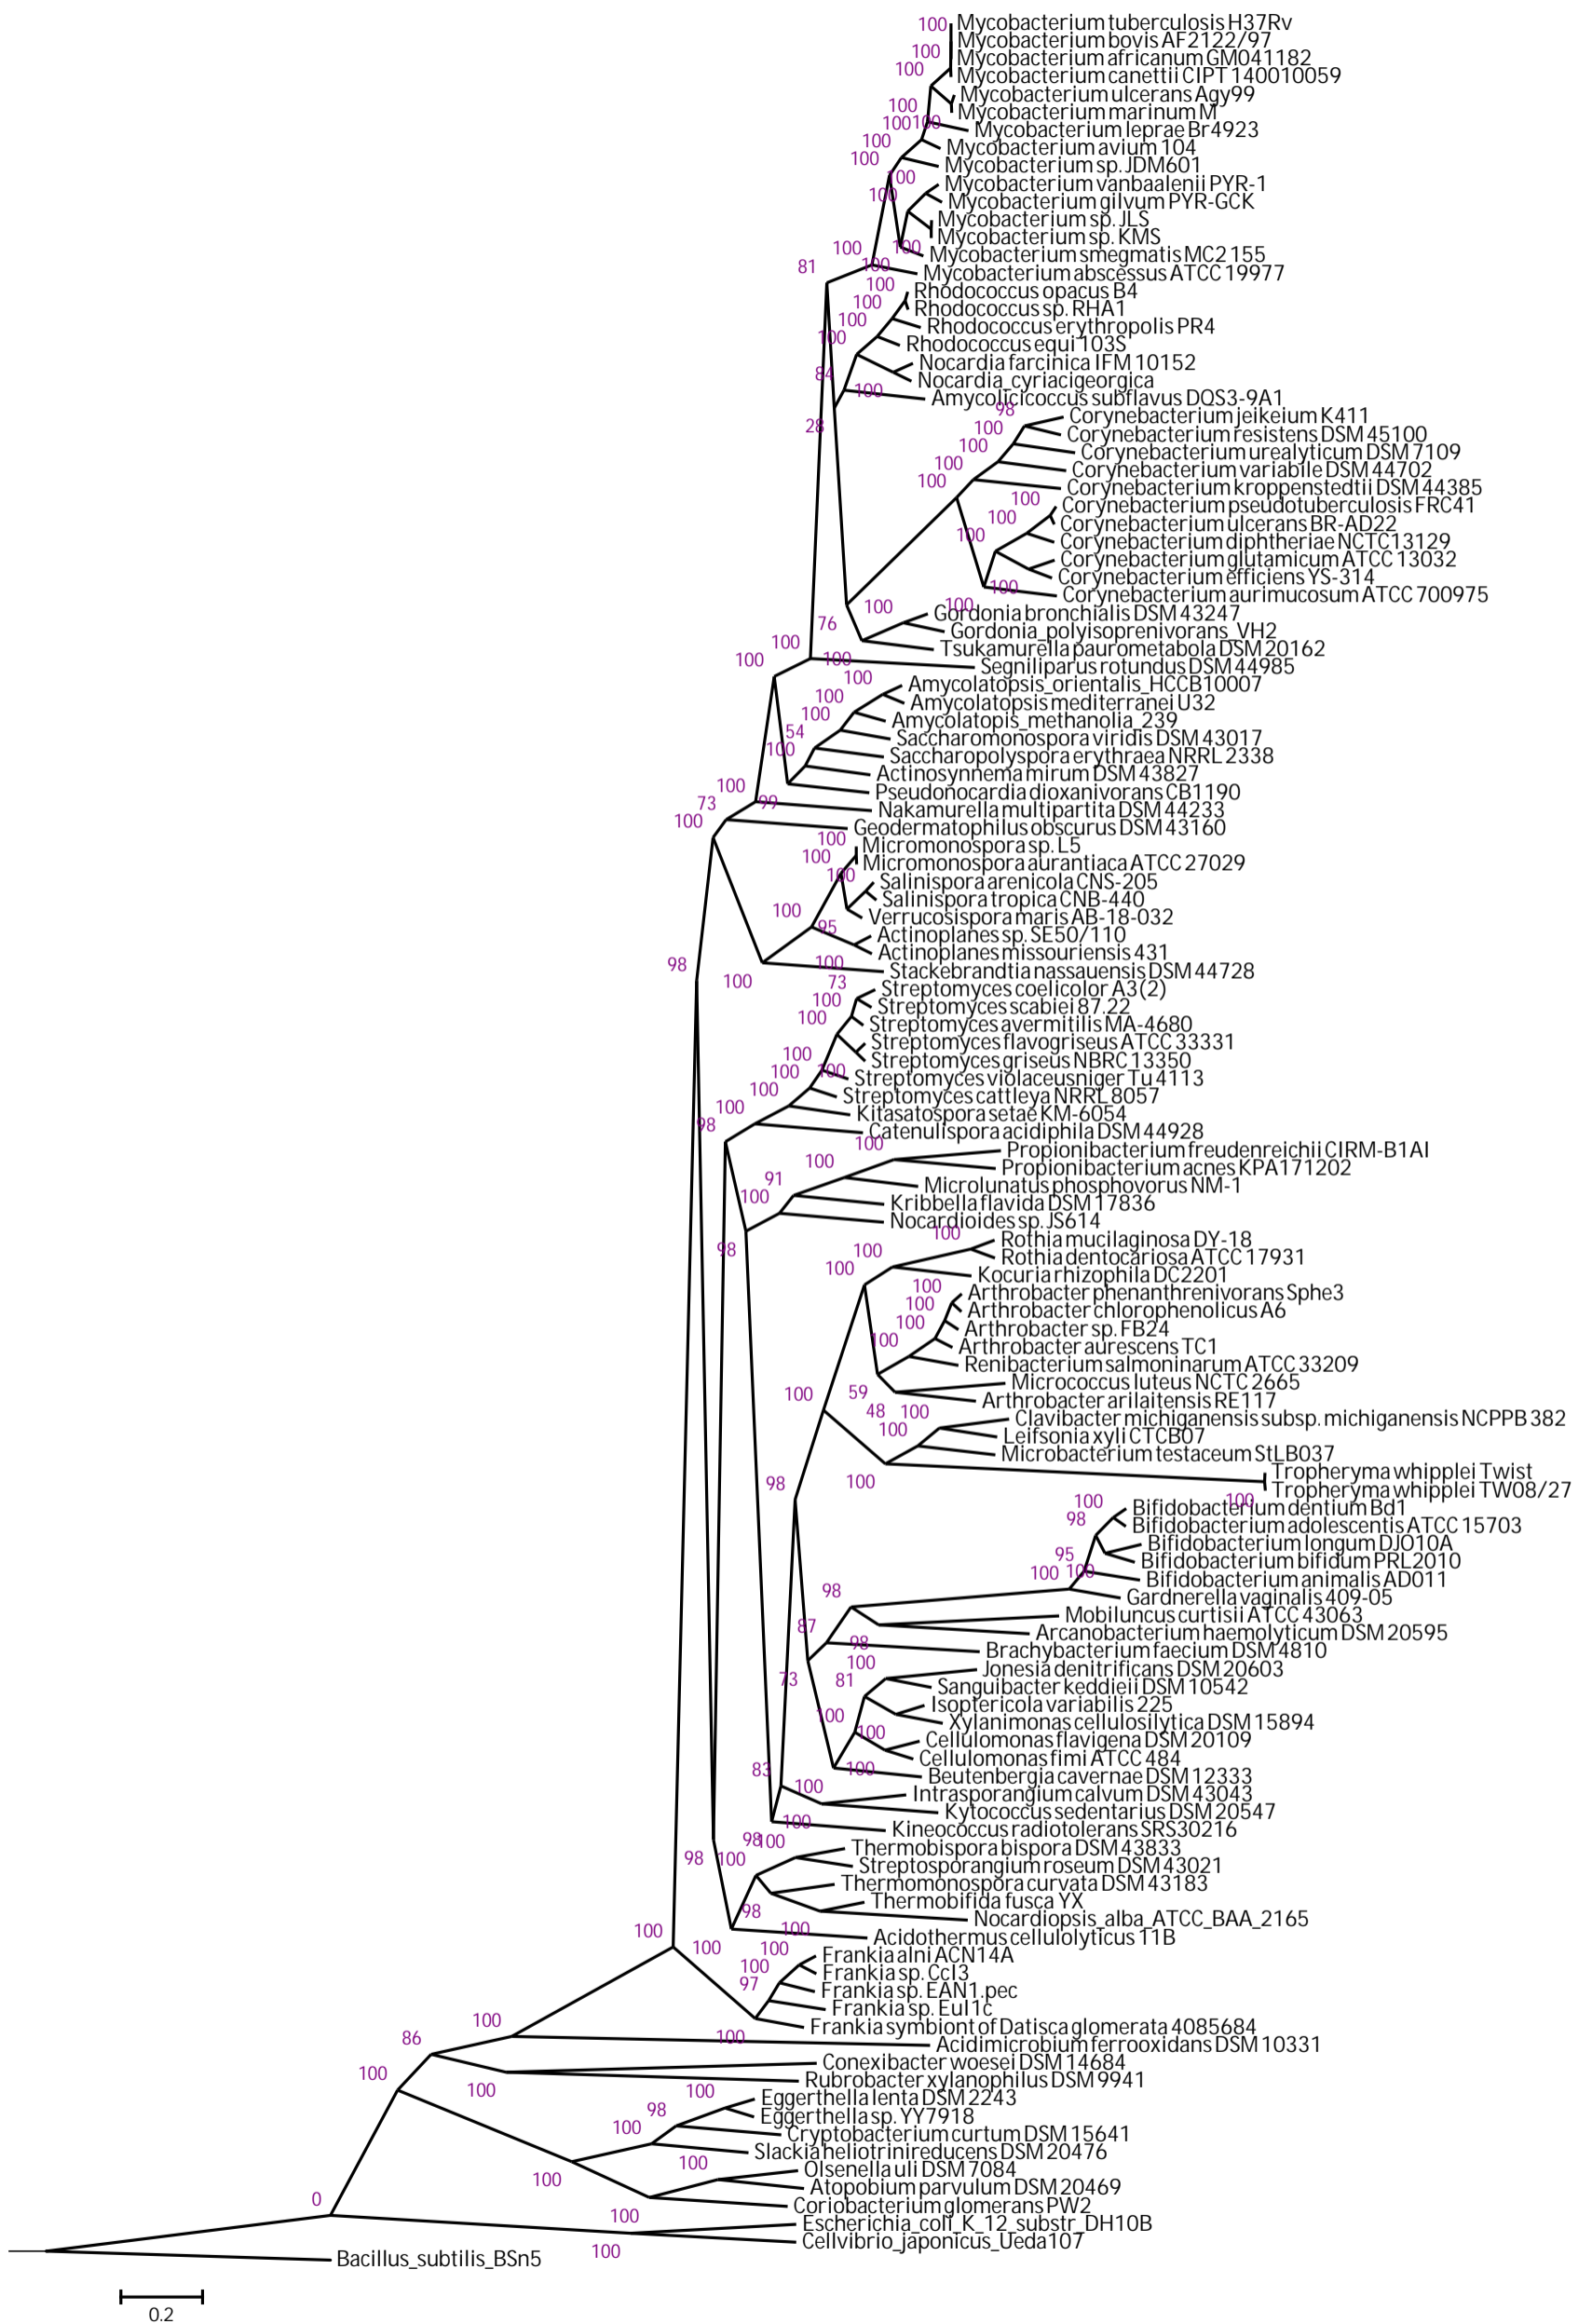

**Table S7.** Proposed secondary metabolite gene clusters in *Amycolatopsis* strains

| Strain                                 | Subclade | Complete/draft<br>genome<br>sequences | Proposed<br>secondary<br>metabolites |     | PKS-NRPS |      | Genome<br>size<br>(Mb) |
|----------------------------------------|----------|---------------------------------------|--------------------------------------|-----|----------|------|------------------------|
|                                        |          |                                       | gene<br>clusters                     | PKS | hybrid   | NRPS |                        |
| <i>A. balhimycina</i>                  | AOS      | Draft                                 | 29                                   | 4   | 7        | 7    | 10.86                  |
| <i>A. mediterranei</i>                 | AOS      | Complete                              | 30                                   | 5   | 2        | 8    | 10.24                  |
| <i>A. jejuensis</i>                    | AOS      | Draft                                 | 25                                   | 3   | 1        | 5    | 10.1                   |
| <i>A. vancoresmycina</i>               | AOS      | Draft                                 | 55                                   | 21  | 3        | 15   | 9.84                   |
| <i>A. alba</i>                         | AOS      | Draft                                 | 44                                   | 13  | 2        | 9    | 9.81                   |
| <i>A. azurea</i>                       | AOS      | Draft                                 | 39                                   | 10  | 3        | 9    | 9.22                   |
| <i>A. rifamycina</i>                   | AOS      | Draft                                 | 31                                   | 12  | 2        | 6    | 9.2                    |
| <i>A. nigrescens</i>                   | AOS      | Draft                                 | 33                                   | 11  | 1        | 2    | 9.11                   |
| <i>A. lurida</i>                       | AOS      | Draft                                 | 34                                   | 7   | 2        | 7    | 8.99                   |
| <i>A. japonica</i>                     | AOS      | Complete                              | 17                                   | 4   | 0        | 6    | 8.96                   |
| <i>A. orientalis</i>                   | AOS      | Complete                              | 32                                   | 6   | 4        | 5    | 8.95                   |
| <i>A. benzoatilytica</i>               | AOS      | Draft                                 | 23                                   | 2   | 1        | 2    | 8.7                    |
| <i>A. decaplanina</i>                  | AOS      | Draft                                 | 39                                   | 10  | 3        | 6    | 8.53                   |
| <i>A. halophila</i>                    | AOS      | Draft                                 | 13                                   | 2   | 1        | 2    | 5.55                   |
| <i>A. taiwanensis</i>                  | ATS      | Draft                                 | 15                                   | 4   | 1        | 2    | 8.78                   |
| <i>A. methanolica</i> 239 <sup>T</sup> | AMS      | Complete                              | 12                                   | 0   | 0        | 1    | 7.24                   |
| <i>A. thermoflava</i>                  | AMS      | Draft                                 | 16                                   | 3   | 0        | 1    | 8.69                   |
| <i>Amycolatopsis</i> sp.<br>ATCC 39116 | AMS      | Draft                                 | 14                                   | 1   | 0        | 1    | 8.39                   |

All of the proposed secondary metabolite gene clusters were predicted by anti-SMASH. All the genomes are available at GenBank .

**Figure S8.** Ectoine gene clusters in three AMS strains.

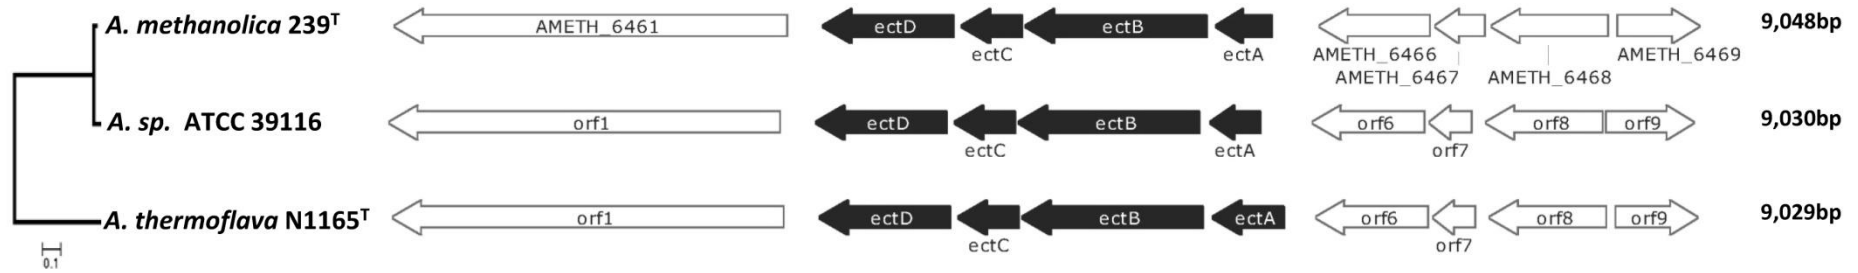

*ectA*, *ectB*, *ectC* and *ectD* are the key genes in ectoine gene cluster with black tags.

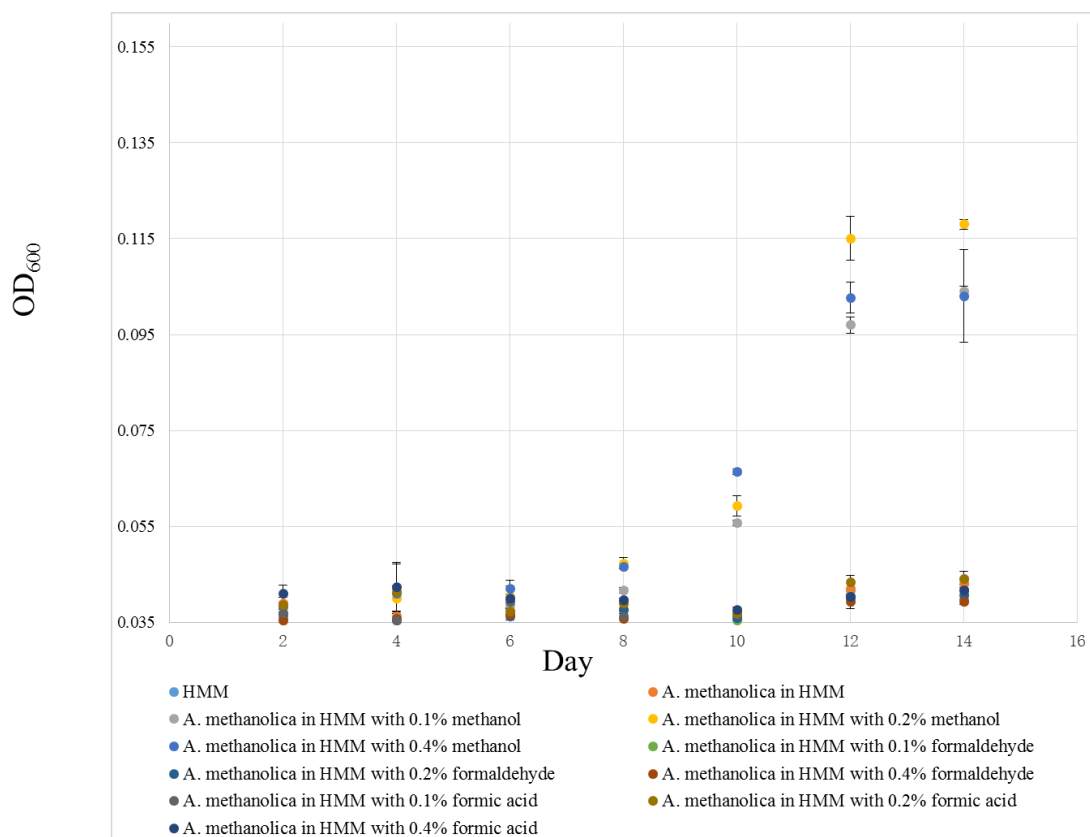

**Figure S9.** Survival curve of *A. methanolica* 239<sup>T</sup> in basic medium HMM with different types and concentration of one carbon source. *A. methanolica* 239<sup>T</sup> grew logarithmically at day 8 in HMM with methanol and achieved steady state after day 12 under the supplementation of methanol.



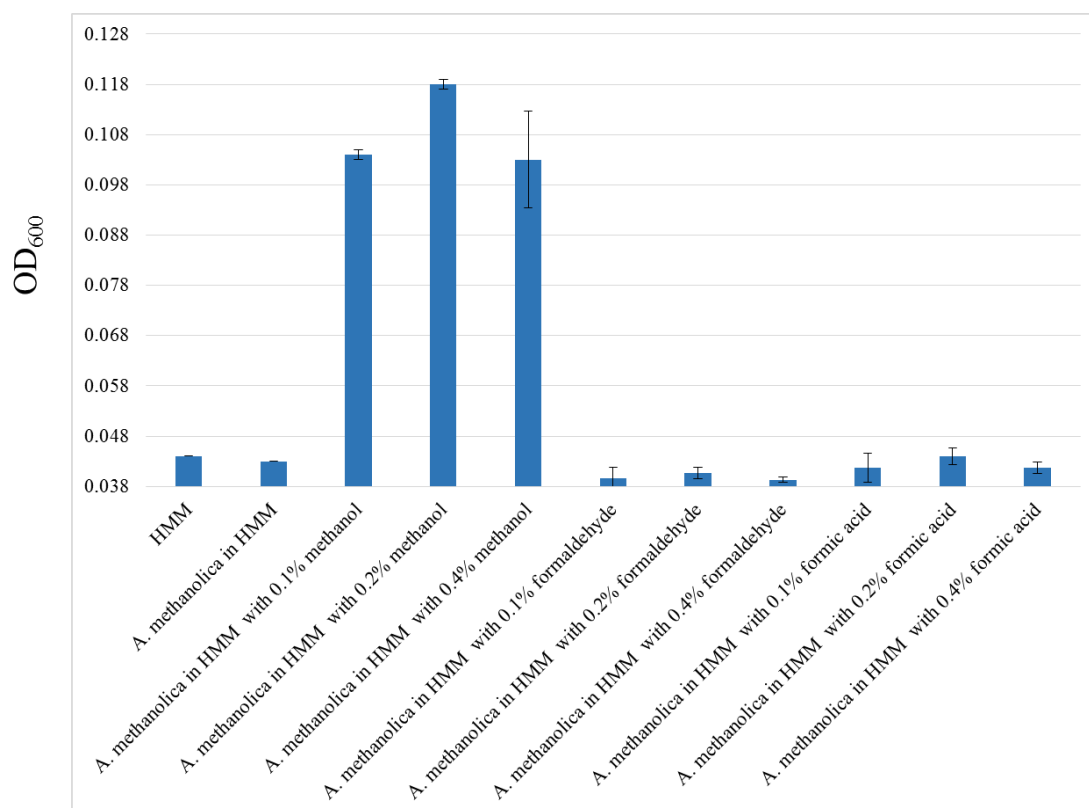

**Figure S10.** Growth status of *A. methanolica* 239<sup>T</sup> in basic medium HMM supplemented with different types and concentration of one carbon sources at day 14. The growth status was evaluated by measurement of OD<sub>600</sub> values. *A. methanolica* 239<sup>T</sup> grew well in HMM with methanol, while restricted in with formaldehyde or formic acid or without any carbon sources.

**Table S8.** Survival state of *A. methanolica* 239<sup>T</sup> under the three one-carbon source

| Liquid broth               | Survival state <sup>a</sup> |
|----------------------------|-----------------------------|
| HMM                        | +                           |
| HMM with 0.1% methanol     | +                           |
| HMM with 0.1% formaldehyde | -                           |
| HMM with 0.1% formic acid  | +                           |

a “+”, strain from the culture can grow on GT plate; “-”, strain from the culture cannot grow on GT plate.

## Method: One-carbon source utilization experiment of *A. methanolica*

*A. methanolica* 239 was maintained on GT plate (20 g/L starch, 0.5 g/L L-asparagine, 1 g/L KNO<sub>3</sub>, 0.5 g/L K<sub>2</sub>HPO<sub>4</sub>•H<sub>2</sub>O, 0.5 g/L NaCl, 0.5 g/L MgSO<sub>4</sub>•7H<sub>2</sub>O, 1 g/L CaCO<sub>3</sub>, and 2 g/L agar, pH 7.5) at 28 °C for 3 days. Then a single colony was picked into 40 ml ISP2 liquid (0.4 % Yeast Extract, 1% Malt Extract, and 0.4 % glucose) and incubated at 28 °C for 4 days as seed. To test the survivals, we put 2 mL seed in the eppendorf tubes, washed it by HMM medium, which was prepared by mixing of (1) 100 mL phosphate salts solution (25.3 g/L K<sub>2</sub>HPO<sub>4</sub> and 22.5 g/L Na<sub>2</sub>HPO<sub>4</sub>), (2) 100 mL sulfate salts solution (5 g/L (NH<sub>4</sub>)<sub>2</sub>SO<sub>4</sub> and 2 g/L MgSO<sub>4</sub>•7H<sub>2</sub>O), (3) 799 mL of deionized water, and (4) 1 mL of trace metal solution (0.177 g/L ZnSO<sub>4</sub>•7H<sub>2</sub>O, 1.466 g/L CaCl<sub>2</sub>•2H<sub>2</sub>O, 0.107 g/L MnCl<sub>2</sub>•4H<sub>2</sub>O, 2.496 g/L FeSO<sub>4</sub>•7H<sub>2</sub>O, 0.177 g/L (NH<sub>4</sub>)<sub>6</sub>Mo<sub>7</sub>O<sub>24</sub>•4H<sub>2</sub>O, 0.374 g/L CuSO<sub>4</sub>•5H<sub>2</sub>O, 0.238 g/L CoCl<sub>2</sub>•6H<sub>2</sub>O and 0.1 g/L Na<sub>2</sub>WO<sub>4</sub>•2H<sub>2</sub>O), for 2 times, followed by resuspending with 1mL HMM. Then, 40 µL of suspension was inoculated into 15mL HMM liquid containing 0.1%, 0.2% or 0.4% of methanol, formaldehyde and formic acid (adjusted the pH to 7.5 before use) as the sole carbon source. HMM without any additives acted as control. For the volatile methanol, a continuous feeding of methanol was performed every two days. Optical density at 600 nm (OD<sub>600</sub>) was also measured every two days. After 14 days of incubation, 10 µL of each liquid broth were spread on the GT plate to evaluate survival state of *A. methanolica* 239. The two ones, *A. methanolica* in HMM with methanol and in HMM without any additives, were served as controls.

**Table S9. Homologous proteins of AMETH\_4518, AMETH\_4520 and AMETH\_4529 in 6 strains of *Pseudonocardiaceae*, 2 strains of *Actinobacteria* and *Bacillus subtilis* BSn5**

|                                 | strain                      | RuMP cluster                                       |                    | genome  |                    |       |
|---------------------------------|-----------------------------|----------------------------------------------------|--------------------|---------|--------------------|-------|
|                                 |                             | protein                                            | identity           | protein | identity           |       |
| <b>AMETH_4518</b><br><i>tkt</i> | class <i>Actinobacteria</i> | <i>A. methanolica</i> 239 <sup>T</sup>             | AMETH_4518         | 100     | AMETH_4092         | 77.63 |
|                                 |                             | <i>A. benzoatilytica</i> AK 16/65 <sup>T</sup>     | WP_020661080.1     | 86.17   | WP_020658161.1     | 77.42 |
|                                 |                             | <i>Saccharomonospora marina</i> XMU15 <sup>T</sup> | SACMADRAFT_RS11650 | 88.5    | SACMADRAFT_RS16110 | 78.05 |
|                                 |                             | <i>A. orientalis</i> HCCB10007                     |                    |         | AORI_2796          | 74.56 |
|                                 |                             | <i>A. mediterranei</i> U32                         |                    |         | AMED_2809          | 74.78 |
|                                 |                             | <i>A. japonica</i> MG417-CF17 <sup>T</sup>         |                    |         | AJAP_24810_4870    | 74.85 |
|                                 |                             | <i>Arthrobacter aureescens</i> TC1                 |                    |         | AAur_2097          | 66.33 |
|                                 |                             | <i>Rhodococcus jostii</i> RHA1                     |                    |         | RHA1_ro07186       | 75.43 |
|                                 |                             | <i>Bacillus subtilis</i> BSn5                      |                    |         | BSn5_00280         | 44.94 |
| <b>AMETH_4520</b><br><i>rpe</i> | class <i>Actinobacteria</i> | <i>A. methanolica</i> 239 <sup>T</sup>             | AMETH_4520         | 100     | AMETH_4130         | 80.29 |
|                                 |                             | <i>A. benzoatilytica</i> AK 16/65 <sup>T</sup>     | WP_020661082.1     | 80.65   | WP_020658131.1     | 78.73 |
|                                 |                             | <i>Saccharomonospora marina</i> XMU15 <sup>T</sup> | SACMADRAFT_RS11640 | 78.22   | SACMADRAFT_RS16305 | 78.37 |
|                                 |                             | <i>A. orientalis</i> HCCB10007                     |                    |         | AORI_2761          | 77.03 |
|                                 |                             | <i>A. mediterranei</i> U32                         |                    |         | AMED_2771          | 77.83 |
|                                 |                             | <i>A. japonica</i> MG417-CF17 <sup>T</sup>         |                    |         | AJAP_25030_4913    | 77.48 |
|                                 |                             | <i>Arthrobacter aureescens</i> TC1                 |                    |         | AAur_1824          | 55.02 |
|                                 |                             | <i>Rhodococcus jostii</i> RHA1                     |                    |         | RHA1_ro07167       | 72.56 |
|                                 |                             | <i>Bacillus subtilis</i> BSn5                      |                    |         | BSn5_20010         | 48.34 |
| <b>AMETH_4529</b><br><i>rpi</i> | class <i>Actinobacteria</i> | <i>A. methanolica</i> 239 <sup>T</sup>             | AMETH_4529         | 100     | AMETH_1699         | 66.67 |
|                                 |                             | <i>A. benzoatilytica</i> AK 16/65 <sup>T</sup>     | WP_027927817.1     | 79.87   | WP_020661131.1     | 65.22 |
|                                 |                             | <i>Saccharomonospora marina</i> XMU15 <sup>T</sup> | SACMADRAFT_RS11605 | 76.13   | SACMADRAFT_RS07965 | 63.87 |
|                                 |                             | <i>A. orientalis</i> HCCB10007                     |                    |         | AORI_1928          | 61.94 |
|                                 |                             | <i>A. mediterranei</i> U32                         |                    |         | AMED_6811          | 68.38 |
|                                 |                             | <i>A. japonica</i> MG417-CF17 <sup>T</sup>         |                    |         | AJAP_29895_5868    | 61.94 |
|                                 |                             | <i>Arthrobacter aureescens</i> TC1                 |                    |         | AAur_2387          | 51.63 |
|                                 |                             | <i>Rhodococcus jostii</i> RHA1                     |                    |         | RHA1_ro01378       | 64.97 |
|                                 |                             | <i>Bacillus subtilis</i> BSn5                      |                    |         | BSn5_09415         | 35.86 |
